# Supplementary material for: Implementation processes in a cognitive rehabilitation intervention for people with dementia: a complexity-informed qualitative analysis
Source: PubMed Central journal article supplement (PMC8549661; doi:10.1136/bmjopen-2021-051255), 2021-10-26
Supplement: bmjopen-2021-051255.draft_revisions.pdf [file bmjopen-2021-051255.draft_revisions.pdf]

# BMJ Open

BMJ Open is committed to open peer review. As part of this commitment we make the peer review history of every article we publish publicly available.

When an article is published we post the peer reviewers' comments and the authors' responses online. We also post the versions of the paper that were used during peer review. These are the versions that the peer review comments apply to.

The versions of the paper that follow are the versions that were submitted during the peer review process. They are not the versions of record or the final published versions. They should not be cited or distributed as the published version of this manuscript.

BMJ Open is an open access journal and the full, final, typeset and author-corrected version of record of the manuscript is available on our site with no access controls, subscription charges or pay-per-view fees (<http://bmjopen.bmj.com>).

If you have any questions on BMJ Open's open peer review process please email [info.bmjopen@bmj.com](mailto:info.bmjopen@bmj.com)

# BMJ Open

## Implementation as self-organisation: findings of the GREAT trial process evaluation from a complexity perspective

|                               |                                                                                                                                                                                                                                                                                                                                                                                                                                                                                                                                                                                                                                                                                                                                                                     |
|-------------------------------|---------------------------------------------------------------------------------------------------------------------------------------------------------------------------------------------------------------------------------------------------------------------------------------------------------------------------------------------------------------------------------------------------------------------------------------------------------------------------------------------------------------------------------------------------------------------------------------------------------------------------------------------------------------------------------------------------------------------------------------------------------------------|
| Journal:                      | <i>BMJ Open</i>                                                                                                                                                                                                                                                                                                                                                                                                                                                                                                                                                                                                                                                                                                                                                     |
| Manuscript ID                 | bmjopen-2021-051255                                                                                                                                                                                                                                                                                                                                                                                                                                                                                                                                                                                                                                                                                                                                                 |
| Article Type:                 | Original research                                                                                                                                                                                                                                                                                                                                                                                                                                                                                                                                                                                                                                                                                                                                                   |
| Date Submitted by the Author: | 17-Mar-2021                                                                                                                                                                                                                                                                                                                                                                                                                                                                                                                                                                                                                                                                                                                                                         |
| Complete List of Authors:     | Morgan-Trimmer, Sarah; University of Exeter, College of Medicine and Health<br>Kudlicka, Aleksandra; University of Exeter, College of Medicine and Health<br>Warmoth, Krystal ; University of Hertfordshire, School of Health and Social Work & NIHR Applied Research Collaboration East of England<br>Leroi, Iracema; Global Brain Health Institute, School of Medicine<br>Oyebode, Jan; University of Bradford, Centre for Applied Dementia Studies<br>Pool, Jackie; QCS Quality Compliance Systems, Dementia Pal Ltd<br>Woods, Robert; Bangor University, Dementia Services Development Centre Wales, School of Health Sciences<br>Clare, Linda; University of Exeter, College of Medicine and Health & NIHR Applied Research Collaboration South-West Peninsula |
| Keywords:                     | Dementia < NEUROLOGY, HEALTH SERVICES ADMINISTRATION & MANAGEMENT, QUALITATIVE RESEARCH                                                                                                                                                                                                                                                                                                                                                                                                                                                                                                                                                                                                                                                                             |
|                               |                                                                                                                                                                                                                                                                                                                                                                                                                                                                                                                                                                                                                                                                                                                                                                     |

SCHOLARONE™  
Manuscripts

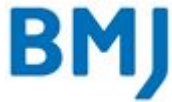

I, the Submitting Author has the right to grant and does grant on behalf of all authors of the Work (as defined in the below author licence), an exclusive licence and/or a non-exclusive licence for contributions from authors who are: i) UK Crown employees; ii) where BMJ has agreed a CC-BY licence shall apply, and/or iii) in accordance with the terms applicable for US Federal Government officers or employees acting as part of their official duties; on a worldwide, perpetual, irrevocable, royalty-free basis to BMJ Publishing Group Ltd ("BMJ") its licensees and where the relevant Journal is co-owned by BMJ to the co-owners of the Journal, to publish the Work in this journal and any other BMJ products and to exploit all rights, as set out in our [licence](#).

The Submitting Author accepts and understands that any supply made under these terms is made by BMJ to the Submitting Author unless you are acting as an employee on behalf of your employer or a postgraduate student of an affiliated institution which is paying any applicable article publishing charge ("APC") for Open Access articles. Where the Submitting Author wishes to make the Work available on an Open Access basis (and intends to pay the relevant APC), the terms of reuse of such Open Access shall be governed by a Creative Commons licence – details of these licences and which [Creative Commons](#) licence will apply to this Work are set out in our licence referred to above.

Other than as permitted in any relevant BMJ Author's Self Archiving Policies, I confirm this Work has not been accepted for publication elsewhere, is not being considered for publication elsewhere and does not duplicate material already published. I confirm all authors consent to publication of this Work and authorise the granting of this licence.

1  
2  
3 **Implementation as self-organisation: findings of the GREAT trial process evaluation from a**  
4 **complexity perspective**  
5  
6  
7

8 Sarah Morgan-Trimmer, College of Medicine and Health, University of Exeter, St Lukes Campus,  
9 Heavitree Road, Exeter, EX1 2LU, UK. Email: [s.morgan-trimmer@exeter.ac.uk](mailto:s.morgan-trimmer@exeter.ac.uk) (corresponding author)  
10

11 Aleksandra Kudlicka, College of Medicine and Health, University of Exeter, Exeter, UK  
12

13 Krystal Warmoth, Centre for Research in Public Health and Community Care (CRIPACC), School of  
14 Health and Social Work, University of Hertfordshire; NIHR Applied Research Collaboration East of  
15 England, UK  
16

17 Iracema Leroi, Global Brain Health Institute, Trinity College Dublin, Dublin, Ireland  
18

19 Jan Oyeboode: Centre for Applied Dementia Studies, University of Bradford, UK  
20

21 Jackie Pool, Dementia Pal Ltd, QCS Quality Compliance Systems, UK  
22

23 Robert Woods, Dementia Services Development Centre Wales, School of Health Sciences, Bangor  
24 University, Bangor, UK  
25

26 Linda Clare: College of Medicine and Health, University of Exeter, Exeter, UK; NIHR Applied Research  
27 Collaboration South-West Peninsula, UK  
28  
29

30  
31  
32 **Wordcount:** 5536  
33  
34  
35  
36  
37  
38  
39  
40  
41  
42  
43  
44  
45  
46  
47  
48  
49  
50  
51  
52  
53  
54  
55  
56  
57  
58  
59  
60

## Abstract

**Objectives:** Health care is often delivered through complex interventions. Understanding how to implement these effectively is important for optimising services. This article demonstrates how the complexity theory concept of 'self-organisation' can inform implementation, drawing on a process evaluation within a randomised controlled trial of the GREAT intervention which compared cognitive rehabilitation for people with dementia with usual treatment.

**Design:** A process evaluation examined experiences of GREAT therapists and participants receiving the intervention, through thematic analysis of a focus group with therapists and interviews with participants and their carers. Therapy records of participants receiving the intervention were also analysed using adapted framework analysis. Analysis adopted a critical realist perspective and a deductive-inductive approach to identify patterns in how the intervention operated.

**Setting:** The GREAT intervention was delivered through home visits by therapists, in eight regions in the UK.

**Participants:** Six therapists took part in a focus group, interviews were conducted with 25 participants and 26 carers, and therapy logs for 50 participants were analysed.

**Intervention:** A 16-week cognitive rehabilitation programme for people with mild-to-moderate dementia.

**Results:** 'Self-organisation' of the intervention occurred through adaptations made by therapists. Adaptations included simplifying the intervention for people with greater cognitive impairment, and extending it to meet additional needs. Relational work by therapists produced an emergent outcome of 'social support'. Self-organised aspects of the intervention were less visible than formal components, but were important aspects of how it operated during the trial. This understanding can help to inform future implementation.

**Conclusions:** Researchers are increasingly adopting complexity theory to understand interventions. This study extends the application of complexity theory by demonstrating how 'self-organisation' was a useful concept for understanding aspects of the intervention that would have been missed by focusing on formal intervention components. Analysis of self-organisation could enhance future process evaluations and implementation studies.

## Article Summary

### Strengths and limitations of this study

- This study advances the application of complexity theory for evaluating health interventions, demonstrating how the concept of 'self-organisation' can be usefully applied in a process evaluation.
- Findings show how examining 'self-organisation' can help identify informal and less visible processes which are important for understanding how interventions operate.
- A limitation of the study is that it only reports therapist and participant perceptions of how the intervention operated; researcher observations of therapy sessions were not conducted.
- This study included a small number of focus group participants, interviewees and therapy records; the study was designed to produce theoretical generalisability through in-depth analysis rather than a large sample size.

## Background

### *Introduction*

This article discusses the application of the complexity theory concept of ‘self-organisation’ for understanding implementation. Implementation, defined here as “*the process through which interventions are delivered, and what is delivered in practice*” (1: 8), is an important element of process evaluation. This is distinct from the definition of implementation within the field of ‘implementation science’ which “*is the scientific study of methods to promote the systematic uptake of research findings and other evidence-based practices into routine practice*” (2: 1). It reports findings from a process evaluation which addressed several research questions, including “how was the intervention implemented?”. Process evaluations may be the first opportunity to closely study, refine and optimise implementation of a new intervention. Findings on implementation can then inform wider roll-out of interventions at the post-trial stage (1).

Existing approaches to implementation employed by process evaluations face two main limitations. First, process evaluations are often structured using logic models which represent the underlying theory of how an intervention, including implementation processes, work (3). Logic models usefully provide a simple-enough model on which to base an evaluation, but in doing so they tend to conceptualise the world in a relatively linear, mechanistic way. Second, logic models focus attention on whether a certain process happened, rather than unexpected events, because they represent ideal versions of what researchers hypothesise will occur. Within this approach, implementation of the intervention tends to be examined in terms of fidelity to this ideal version. However, during implementation, some components of the intervention may not have been delivered as anticipated, additional components may have been introduced, and components may have interacted with each other or contextual factors in unexpected ways. These aspects may be missed if data are only collected on components identified in logic models. This article discusses the application of the complexity theory concept of ‘self-organisation’ for improving understanding of how complex health interventions are implemented. It examines how it can be applied through analysing process evaluation data from a trial of a community-based cognitive rehabilitation (CR) intervention for people with dementia (4, 5).

### ***Complexity theory and self-organisation***

Complexity theory has been increasingly advocated as an alternative theoretical lens for understanding complex interventions, and is being increasingly applied in evaluation studies (6-10). It theorises systems of different types – social, physical, biological – as constantly self-organising and unfolding. A complex system cannot be understood only in terms of its parts, as a complicated machine for example, where the causal powers of the system are explained by its components (6, 9, 11). Processes occur in complex systems through the dynamic, non-linear relations between components at different levels as interacting parts of a system, producing effects in unpredictable ways (12, 13). Complexity theory encompasses a range of concepts which describe how patterns occur, including self-organisation, feedback loops and emergence (10, 12-14). Complex health interventions can be conceptualised as complex systems since they incorporate multiple interacting

1  
2  
3 elements such as humans (as active and responsive agents), organisations, materials, rules, policies  
4 and so on, through which these patterns may occur (6, 11, 12). Complexity approaches also  
5 conceptualise the system within which an intervention is introduced as complex, unfolding,  
6 interacting with and changed by the intervention: systems are nested within other systems and  
7 cannot be isolated (6, 13-16).  
8  
9

10  
11 This article draws on the complexity concept of 'self-organisation', and the additional concepts of  
12 'emergence' and 'feedback loops', and explores their application to studying implementation. 'Self-  
13 organisation' refers to interacting elements of a system, such as practitioners, who behave or make  
14 individual micro-level decisions in response to other elements of a system (such as clients) in a way  
15 which produces patterns or order at a higher level (10, 13). This order is produced in a bottom-up  
16 way since it occurs as the result of individual decisions which are not coordinated, rather than  
17 through top-down instructions. The order which is created is 'emergent', as it appears at the overall  
18 intervention level and occurs somewhat unpredictably. A common form of self-organisation occurs  
19 through feedback loops, for example where practitioners tailor how they deliver an intervention in  
20 response to client reactions to the intervention (11).  
21  
22  
23

24  
25 Self-organisation can operate within or beyond the formal design of an intervention. Some  
26 interventions are designed to be partly self-organising, where the practitioner is expected to adapt  
27 the intervention according to individual client needs for example, as long as the core functions of the  
28 intervention are delivered (17, 18). Other forms of self-organisation occur outside of the prescribed  
29 parameters of the intervention, through deviation from protocols for example. Through micro-level  
30 decisions about adaptations, practitioner behaviours result in self-organisation as their patterns of  
31 behaviour at a collective level shape what intervention is actually delivered. Self-organisation is not  
32 commonly theorised as being part of implementation processes, yet could significantly influence  
33 implementation and, in turn, intervention outcomes.  
34  
35  
36  
37

38 While complexity theory may explain the real world more adequately than linear models, there are  
39 challenges in applying it within a process evaluation. Complexity theory is a collection of related  
40 concepts which are often presented in overlapping rather than standardised lists, and does not have  
41 an agreed definition (10). It is not yet a consolidated theory in that there are questions about how  
42 concepts are related to each other (9, 14). Complexity theory also tends to emphasise the  
43 unpredictability of outcomes and produce post-hoc explanations rather than having strong  
44 predictive power (10, 19). This is somewhat at odds with the aim of process evaluation, and research  
45 more generally, to identify generalisable patterns, 'demi-regularities' or predictive theories (6).  
46 However, the emphasis on unpredictability varies within the family of complexity theory approaches  
47 (6). This article examines the application of complexity concepts, particularly 'self-organisation', in a  
48 process evaluation and reflects on its use for understanding the implementation of complex health  
49 interventions.  
50  
51  
52  
53

### 54 ***The GREAT trial***

55  
56  
57 The GREAT study was a randomised controlled trial, with an embedded process evaluation, of a CR  
58 intervention for people with a clinical diagnosis of dementia (referred to here as 'participants') and  
59 a Mini Mental State Examination (MMSE) score of  $\geq 18$  points indicating mild to moderate cognitive  
60

1  
2  
3 impairment (20, 21). It was delivered in eight regions in the UK. The main purpose of the  
4 intervention was to improve ability to carry out everyday activities in the areas the participant  
5 chose to target. The intervention involved identifying with the participant personally relevant and  
6 significant goals related to daily activities, and then working together to develop and implement a  
7 set of strategies to enable the person to achieve the desired outcomes. The primary outcome was  
8 participant-reported progress towards participant-identified goals at three months. It was  
9 delivered by a practitioner (eight of whom were occupational therapists and one a nurse) during  
10 one-hour home visits, ideally with a carer also present at part of the session. The participant, with  
11 carer support, was encouraged to implement agreed changes in daily routines and practise  
12 strategies between visits. Ten visits were delivered over three months, followed by four  
13 maintenance sessions over six months. The intervention was detailed in a practitioner handbook  
14 which included a structured protocol (22); the core component of sessions was to work towards  
15 personalised goals, supplemented by strategies to improve attention and concentration,  
16 compensatory strategies, and restorative strategies for retaining new information or improving  
17 recall. Additional optional components included anxiety management, increasing activity levels,  
18 discussing carer well-being, and signposting to other services. Training sessions and regular group  
19 and individual supervision was provided for the therapists. Full details of the intervention, trial  
20 methods and trial outcomes have been published (4, 5, 20, 23).

21  
22  
23  
24  
25  
26  
27  
28 The intervention was personalised in that participants could identify up to three goals they wished  
29 to work towards and the therapists applied CR strategies to address these. The intervention was  
30 also designed to be responsive to participant needs in that therapists had some flexibility to apply  
31 elements of the intervention such as anxiety management, depending on the needs of the  
32 participant and their personal and social contexts. The handbook reflected this balance between  
33 structure and flexibility, for example:

34  
35  
36  
37 *The intervention in a trial needs to follow a structured protocol, as summarised in Table 1*  
38 *below. However, some flexibility will be needed as participants will have varying needs and*  
39 *preferences and will progress at different rates.*

40 GREAT Handbook for Therapists (22: 40)

41  
42  
43 This article examines the implementation of the GREAT intervention, where the intervention is  
44 conceptualised as a complex intervention designed to incorporate a degree of self-organisation  
45 through its person-centred design and requirement to be responsive to the contexts, needs and  
46 preferences of people with dementia.

## 47 48 49 **Methods**

50  
51  
52 This article draws on findings from three datasets which were analysed for the GREAT trial  
53 process evaluation (7). Methods and findings are reported in accordance with the Standards for  
54 Reporting Qualitative Research (SRQR) checklist (Appendix 1). A focus group and intervention  
55 therapy logs examined the perceptions and experiences of therapists, and a set of interviews  
56 explored the perceptions and experiences of participants and their carers. Written informed  
57 consent was obtained at the beginning of the trial. Trial researchers and therapists were  
58 trained to monitor ongoing consent and identify and respond to any indication of possible  
59  
60



1  
2  
3 withdrawal of consent. Researchers began participant and carer interviews by re-establishing  
4 consent.  
5

### 6 7 **Focus Group**

8 A focus group was conducted with six of the nine therapists at the end of the first year of the  
9 intervention to examine their experiences of the intervention (see Appendix 2 for schedule). The  
10 focus group was conducted as part of the second annual training event for the trial therapists. The  
11 discussion was facilitated by co-author and trial co-investigator JO. She had a thorough  
12 understanding of the intervention but was not involved in supervising the therapists, which  
13 facilitated an open discussion. It was digitally recorded, transcribed verbatim and uploaded to NVivo  
14 11. A thematic analysis, underpinned by a critical realist perspective, was conducted by the lead  
15 author, SMT, who had not been involved in the study up to this point (24). Data were initially coded  
16 using a combined inductive-deductive approach, drawing on the dementia literature informing the  
17 GREAT trial (4). Themes were then developed, after first summarising the codes, and graphics were  
18 developed to represent and analyse themes at a more interpretive level. This article draws on three  
19 themes relevant to implementation: the perceived influence of the severity of dementia; adaptation  
20 work of therapists in response to the severity of dementia; and the relational work conducted by  
21 therapists.  
22  
23  
24  
25  
26  
27

### 28 **Analysis of therapy logs**

29 Therapy logs were maintained for every participant for each of the 14 sessions and included detail  
30 about each intervention component, such as progress towards goals (see Appendix 3 for categories  
31 included in therapy logs). These logs were analysed by SMT to try to identify factors which might  
32 explain how participants benefitted from the intervention, or not. Therapy logs were analysed to  
33 compare the 25 participants with the best primary outcomes (the 'good outcomes' group) and the  
34 25 participants with the poorest primary outcomes (the 'poor outcomes' group), out of the  
35 intervention arm population of 281 individuals.  
36  
37  
38

39 An adapted framework analysis method was employed, using deductive categories identified in the  
40 focus group findings and also inductive categories where novel factors were identified (25). The  
41 analysis aimed to identify differences in patterns in each group, paying attention to both qualitative  
42 and quantitative differences. First, each component for each session was summarised and compared  
43 between the 'best outcomes' and 'poor outcomes' groups. Second, the trajectory of each  
44 participant's progress through the intervention was summarised and then compared by group.  
45 Third, a 'negative case analysis' was conducted to explore factors which did not fit with the general  
46 patterns emerging from the first two stages of the analysis.  
47  
48  
49  
50

### 51 **Interviews**

52 Face-to-face, semi-structured interviews were conducted with 25 participants and 26 carers at nine  
53 months post-intervention, to explore their experiences of the intervention (see Appendix 4 for  
54 interview schedule). They were consecutively sampled across three different sites sites (North  
55 Wales, South Wales and Greater Manchester) where the intervention was taking place and where  
56 there was a research assistant not otherwise involved in the trial available to complete the  
57 interviews. Participants and carers were interviewed separately wherever possible, starting with the  
58 person with dementia. Interviewers took a photograph of the therapist on the visit to prompt the  
59  
60

1  
2  
3 participant's memory of the therapy sessions. If the participant was struggling to recall the therapy  
4 sessions, the interview was completed jointly with the carer. All interviews were audio-recorded,  
5 transcribed verbatim and uploaded to NVivo 11 (4).  
6  
7

8 Data were analysed using thematic analysis which was underpinned by a critical realist position and  
9 which employed an inductive approach to identifying and exploring patterns of meaning (26, 27).  
10 Data were initially coded by four researchers, and then organised into meaningful groups by KW and  
11 SMT. Related themes were clustered together and organised into an overall thematic map.  
12  
13

14 Detailed methods and findings of the focus group, therapy log analysis and interviews have been  
15 reported (4). In a last stage of analysis, themes from the focus group analysis were interpreted in  
16 relation to core concepts in the complexity literature(4, 10). These themes were then further  
17 developed through triangulation with findings from the interviews and therapy log analysis. Findings  
18 on intervention implementation are reported below.  
19  
20  
21

## 22 **Results**

23 Findings presented here explain how the intervention operated as a complex system, and how some  
24 aspects of implementation occurred in a self-organising pattern, through adaptation behaviours of  
25 therapists. These were: simplifying the intervention for people with greater cognitive impairment;  
26 providing additional support in response to participant needs; and conducting relational work to  
27 engage participants, which produced an emergent outcome of increased social support.  
28  
29  
30  
31  
32

### 33 ***Self-organisation through adaptive response***

34 The GREAT intervention incorporated self-organisation in its design: therapists were required to  
35 select CR strategies appropriate for individuals and their social context, and tailor the intervention to  
36 individuals' needs and preferences. Participants and carers reported experiencing the intervention  
37 as personalised:  
38  
39  
40

41 *[Goals] were always relevant to ... obviously relevant to the issues that [therapist] wanted to*  
42 *raise ... And also relevant to, the issues that were important for [person with dementia] ... she*  
43 *worked at a pace that was good for him as well.*  
44

45 (Interview, Carer 5)  
46  
47

48 Therapists reported that they adapted the intervention in response to their perception that  
49 participants with greater cognitive impairment (within the trial population range) were less likely to  
50 engage in and benefit from the intervention. For example, therapists observed that these  
51 participants had more difficulty setting relevant goals or remembering them. Therapists' notes for  
52 participants in the 'poor outcomes' group also described features which could be attributable to  
53 greater cognitive impairment: a tendency to set more basic-level goals; being more likely to give up  
54 on a goal; lower levels of motivation; being more withdrawn during sessions; and having less  
55 awareness regarding their condition.  
56  
57  
58  
59  
60

1  
2  
3 Therapists responded to participants with greater cognitive impairment through adapting their  
4 delivery of the intervention for these participants in several ways. First, because it was difficult for  
5 these participants to absorb information, therapists would slow down the pace of delivery and only  
6 deliver what they thought were the most relevant sections:  
7  
8

9  
10 *Therapist 5: I was almost going at a snail's pace, because I realised it was far too much*  
11 *information to dish out, and I was literally cherry-picking the bits I thought were relevant so I*  
12 *could get through the goals and get them rated, and just literally [Several people agreeing]*  
13 *Therapist 4: And, sometimes you do have to cherry pick don't you? [Several people agreeing].*  
14 (Therapist focus group)  
15  
16

17 Therapists also tailored the timing of material, moving some supplementary topics to an alternative  
18 session for example:  
19

20  
21 *Therapist 6: But there's too much information for me, so let alone someone who has to take a*  
22 *while, or so I've started moving things away*  
23 *Therapist 4: Oh, I've moved things very early on, I moved the anxiety stuff, unless it's the*  
24 *glaring, big problem, I move anxiety from week 1 to week 2 because it's too much information.*  
25 (Therapist focus group)  
26  
27

28  
29 In addition, therapists reported that they simplified some of the language in the handbook:  
30

31 *Therapist 7: The 'restorative' and 'compensatory', that's too jargon-y, and too heavy for the*  
32 *person, not all, but some of the people with dementia...*  
33 *Therapist 2: Yes, I've had to change the words to 'methods', because 'strategies' just scares*  
34 *them.*  
35 (Therapist focus group)  
36  
37  
38

39 In these ways, therapists made individual, micro-level decisions to ensure the intervention matched  
40 the needs of participants with greater cognitive impairment, and sometimes adapted the content  
41 from the intervention protocol (22). This is an example of self-organisation operating in a feedback  
42 loop, where practitioners adapted an intervention according to the perceived capacity of people  
43 with dementia. Through this adaptation work, they shaped the nature of intervention for some  
44 participants.  
45  
46  
47

### 48 **Self-organisation through extending the intervention**

49

50 Carers were important for the delivery of the intervention because they supported the practice of  
51 new techniques, and could also impact on participant motivation. Difficulty engaging some carers  
52 was noted in the therapy logs and, in the focus group, therapists reported additional efforts they  
53 made to engage carers. For example, therapists sometimes adjusted the time allocated (often  
54 increasing it) for home visits and also changed the timing of visits to ensure they met with carers:  
55  
56  
57

58 *Therapist 7: I mean I've done home visits at 8 o'clock in the evening, just to catch up with the*  
59 *carer, so I can have face-to-face and actually get what's going on, because I can't get hold of*  
60

1  
2  
3 *her during the day, she just doesn't answer her phone. So, having to do home visits in the*  
4 *evening, so that's impacting, that's where the hours are coming in, from doing more of that*  
5 *work...*

6  
7 *Therapist 6: I've often gone out on home visits, and they've [the carer has] gone out. Then you*  
8 *have to extend your visit by an extra 20, 30 minutes because, you don't want to just leave... So*  
9 *you have to extend your visit sometimes, or you have to ring [the carer] afterwards.*

10  
11 (Therapist focus group)  
12

13  
14 Therapists sometimes also had to take additional time to identify and meet additional carers who  
15 were most likely to be the person supporting the intervention but not the carer who was originally  
16 nominated to take part in the intervention:  
17

18  
19 *Therapist 4: Actually the workload increases for us, because what we're doing is we're talking*  
20 *to the carer that's on the spot, and we're also having to liaise with the son and daughter,*  
21 *either by text or email, or something else in the evenings, that has quite a massive implication*  
22 *[agreement from others].*

23  
24 (Therapist focus group)  
25

26  
27 Therapists also delivered several 'add-on' components in response to the needs of participants.  
28 First, the intervention component to address carers' levels of well-being was formally limited in the  
29 handbook to referring carers to local sources of support: *You can direct carers to appropriate*  
30 *sources of support in the local area, and encourage them to access these (22: pg. 51).* However, one  
31 therapist reported contacting services directly:  
32

33  
34 *Therapist 7: I'm also contacting social services, so that the carer will get a break, that shouldn't*  
35 *be part of my role, but no-one else seems to.*

36  
37 (Therapist focus group)  
38

39  
40 Second, therapists commented on (often marital) conflict in the relationships between participants  
41 and their carers, also noted in therapy logs, and attempted to reduce conflict even though they were  
42 aware it was beyond the parameters of the intervention:  
43

44  
45 *Therapist 2: I do find that it's about the nature of the relationship as well. And often you do find,*  
46 *like you're doing a couples intervention, it's not just about the dementia, it's often about the*  
47 *dynamics that have probably gone on through their whole relationship but the situation is*  
48 *highlighting it, and that's really quite difficult to manage, isn't it?*

49  
50 *Therapist 6: Sometimes it's like marriage counselling*

51  
52 *Therapist 2: Yeah... it's about their relationship, isn't it, it is a bit of the couples stuff, and I find*  
53 *myself doing that, and I think it is helpful, but it's beyond what we've been given.*

54  
55 (Therapist focus group)  
56

56  
57 Several carers described in interviews how the therapist acted as a mediator in conflicts between the  
58 carer and person with dementia. Carers also reported improved relationships between themselves  
59 and participants as a result of the intervention, for example having increased understanding of and  
60

1  
2  
3 patience with the person with dementia. Several participants commented that they had greater  
4 social awareness and were more likely to consider the impact of what they said on others.  
5  
6

7 In these ways, self-organisation occurred through therapists' micro-level decisions to adjust (often  
8 increase) the time taken to engage carers, directly contact services, and reduce conflict between  
9 carers and people with dementia. Some therapists extended the intervention so that it was larger in  
10 scope than described in the handbook. These patterns of self-organisation can also be understood in  
11 term of feedback loops, where therapists' adaptive behaviours were in response to the contexts and  
12 unmet needs of people with dementia and their carers.  
13  
14

### 15 16 ***Self-organisation in relational work and emergent 'social support' outcomes***

17  
18 Therapists engaged in building relationships with participants and their carers; the intervention  
19 handbook described one of the therapist's roles as '*Developing rapport with participants and carers*  
20 *and building good relationships'* (22: pg. 42). In interviews, people with dementia described positive  
21 relationships with therapists:  
22  
23

24  
25 *Oh fine, yeah fine, got on well ... Easy, yeah she explained everything and, you know, it was no*  
26 *hardship (laughs)...That's right, yeah, well sometimes when people come to see you, ... you're*  
27 *afraid to talk, you know, afraid to say anything when it's a little bit dumb. But she made me*  
28 *feel so comfortable and within a couple of minutes we were just like as though we'd been*  
29 *friends for a long time.*  
30

31 (Interview, Person with dementia 1)  
32  
33

34 Therapists reported that relationships with participants were an important aspect of the  
35 intervention, helping to engage people with dementia in the intervention and motivate them:  
36  
37

38 *Therapist 2: The actual nature of the relationship and that therapeutic rapport, which I think*  
39 *actually counts for a lot, but I think it largely goes unmeasured in a way, what we bring as*  
40 *people, and our relationship, and that's the motivating factor, and it's hard to know how you*  
41 *would measure that, but I think there is a lot about them getting to know you and you*  
42 *becoming part of their routine, and that goes a long way*  
43

44 *Therapist 5: I think they open up don't they*  
45

46 (Therapist focus group)  
47  
48

49 A good relationship was also important for therapists' work in that getting to know participants well  
50 underpinned their ability to help participants identify relevant goals and develop personalised  
51 strategies.  
52

53 Additionally, therapists recognised that their relational work and the provision of social support as  
54 being important in itself and would dedicate time specifically to this aspect of their visits:  
55  
56

57 *Therapist 6: I think sometimes it's that really good for the carer and the participant to have*  
58 *somebody going in and for such a long time. You do work on the goals, but another big part of*  
59 *it is quite, you know, supportive, and you know, social, because you spend the first ten minutes*  
60

1  
2  
3 *of your visit, they just go on about what they've done in the past week, and you can't be like,*  
4 *come on let's crack on [laughter] I think you do see in a lot of people, especially as you go on,*  
5 *they thaw a bit as you visit and then [several people agreeing] I get that good bond by session*  
6 *ten, and you're sad to pull out, but I think that support does really help.*  
7

8 (Therapist focus group)  
9

10  
11 This relational work was self-organising in that therapists conducted relational work and provided  
12 social support, going slightly beyond the intervention parameters by regarding it as an intervention  
13 component in itself and spending more time on this than reflected in the handbook.  
14

15  
16 The social support provided by the therapists also developed into an emergent outcome of the  
17 intervention in that it was perceived as the main benefit for some participants:  
18

19  
20 *Therapist 7: the pleasure of seeing people try and do well, even if they're not achieving their*  
21 *goals, it's the other things that they're getting from it, the social interaction, the time to talk*  
22 *about their condition, the dementia, and it not being hushed away and in the cupboard.*  
23

24 (Therapist focus group)  
25

26 In interviews, some people with dementia were unable to recall the goals they had been working  
27 towards but many commented on the relationship with the therapist and that they would miss the  
28 visits now the therapy had ended. Carers also commented on relational benefits for people with  
29 dementia:  
30

31  
32 *I think my mum just enjoyed it more that somebody was, the social aspects of it, that*  
33 *somebody was coming*  
34

35 (Interview, Carer 1)  
36  
37

38 The therapy log analysis indicated that relational and social support outcomes were an important (or  
39 at least the best-recalled) element of the intervention by people with greater cognitive impairment.  
40 At the end of the intervention, participants from the 'poor outcomes' group were more likely to  
41 refer to the relational or social aspect of the therapist visiting them as a positive element of the  
42 intervention, whereas participants in the 'best outcomes' group were more likely to give examples of  
43 formal components of the intervention that had benefitted them. One therapist also commented in  
44 the focus group that social support could be the primary benefit for the carer.  
45  
46  
47

48 In these ways, relational work conducted by therapists and their provision of social support  
49 extended the scope of intervention as it was described in the handbook. Self-organisation occurred  
50 through micro-level decisions of therapists which helped them deliver the intervention effectively  
51 but also meet the social support needs of participants and in doing so developed into an emergent  
52 outcome.  
53  
54

## 55 Discussion

56  
57  
58 This article provides an example of how process evaluation findings can be interpreted using  
59 complexity theory and the concept of self-organisation. Some implementation processes occurred as  
60

1  
2  
3 self-organisation, through individual decisions made by therapists. These decisions produced 'order'  
4 at a higher level by creating patterns of service delivery and outcomes. The self-organisation of the  
5 intervention occurred partly by design, through a person-centred approach, but also through  
6 adaptations (to severity of dementia), extensions (of therapists' time and social support) and add-on  
7 components (carer support and relationship conflict resolution) (28). The handbook recommended  
8 but did not include detail about the adaptation of the intervention, and also implied flexibility in  
9 relation to the delivery of formal components rather than extending the time allocation or scope of  
10 the intervention (22). It was not always clear, therefore, where self-organisation fell within or  
11 outside of the intervention parameters. Some of the adaptations resulted from therapists'  
12 interpretation of the flexibility allowed within the intervention as an aspect of its personalised  
13 approach, to achieve participants' goals which was the core component of the intervention.  
14 Therapists are likely to have drawn on their professional training and experience to make decisions  
15 about when and how to adapt the intervention. For example, skilled therapists such as OTs would  
16 generally translate complex material for use with clients, such as simplifying language in a handbook.  
17 Therapists also felt they were going beyond the intervention design at times, particularly in feedback  
18 loops when they provided 'add-ons' in response to participants' needs and contexts such as  
19 addressing relationship conflicts. Implementation within a trial context meant the intervention was  
20 described in a structured way in the handbook and there was less flexibility than would be the case  
21 in normal clinical practice. This may have led therapists to view the intervention as relatively  
22 structured and been more likely to view their adaptations as falling outside the intervention  
23 parameters.  
24  
25  
26  
27  
28  
29  
30  
31

32 The findings about self-organisation have several implications for further studies or wider roll-out of  
33 the GREAT intervention. First, the adaptations made by therapists for people with greater cognitive  
34 impairment (within the trial range of a Mini Mental State Examination score of  $\geq 18$  points) could be  
35 added to the handbook as examples of tailoring to the specific needs of the person, and inform  
36 training for therapists. Second, referrals to other services and specialised professionals could be  
37 enhanced in order to meet the wider needs of people with dementia and their carers, particularly  
38 for common issues such as relationship conflict. Third, social support needs could be addressed by  
39 referral to an alternative, less resource-intensive intervention such as befriending. Alternatively, the  
40 emergent outcome of social support, particularly for those with greater cognitive impairment, could  
41 be more formally incorporated into the intervention design. This may require increased resourcing,  
42 including formally incorporating this skill into recruitment and training for professionals, depending  
43 on what prior training practitioners have received (29). This intervention was delivered mainly by  
44 skilled OT therapists who typically offer a range of types of support; if the intervention was delivered  
45 by OT assistants, for example, additional training might be required. This also depends on whether  
46 future interventions are defined as targeted CR interventions or expanded to incorporate the  
47 additional elements observed in this study. Fourth, the time allocation for visits could be revised, or  
48 made more flexible, to accommodate the additional time requirements for some visits due to the  
49 extended or 'add-on' components provided. Lastly, future evaluations of the intervention could  
50 investigate the impact of social support for participants and carers, since findings indicated this area  
51 was important but an in-depth examination of this was beyond the scope of the study.  
52  
53  
54  
55  
56  
57  
58  
59  
60

1  
2  
3 This analysis had several limitations. First, the qualitative data are the views and perceptions of the  
4 therapists, participants and carers of how the intervention operated, and the therapy logs were  
5 relatively brief notes made by therapists. Second, only one focus group of six therapists was  
6 conducted, and the therapy log analysis was limited to 50 participants. However, this analysis was  
7 designed to produce theoretical generalisability through in-depth analysis rather than a large sample  
8 size.  
9  
10

11  
12 Applying a complexity theory lens had advantages over traditional process evaluation approaches. It  
13 explained how decisions dispersed throughout a system at the micro-level interacted with  
14 population characteristics and context, and how this influenced what intervention was delivered and  
15 what outcomes it produced. This type of self-organising feedback loop is likely to be a common  
16 pattern in health interventions, where practitioners adapt interventions to meet the needs of their  
17 clients. It may be particularly common where participants have high levels of unmet needs, co-  
18 morbidities or in complex cases. Future studies of implementation could analyse the micro-  
19 processes of self-organisation specifically, in addition to formal components of interventions. This  
20 type of approach requires an agnostic position on fidelity of intervention delivery since lack of  
21 adherence to intervention protocols is not necessarily a negative aspect of the intervention.  
22 Although some degree of fidelity is important for studies such as trials, understanding how  
23 adaptation may occur is important for real-world implementation. Adaptive behaviours could be  
24 positive in that they support individuals, help engage participants, and help tailor the intervention to  
25 a local context (12). However, adaptive behaviours could also create difficulties if they expand the  
26 scope of the intervention beyond what is possible for sustained delivery, or are ineffective.  
27 Expansion could displace the delivery of core components of the intervention, for example, or lead  
28 to burnout in practitioners. Clarity about the balance required between fidelity and adaptation is  
29 therefore necessary (30).  
30  
31  
32  
33  
34  
35

36  
37 A complexity perspective was also useful in that it identified informal, less visible processes which  
38 might not be picked up by standard evaluation models measuring fidelity against formal components  
39 and protocols. One particularly informal and non-visible aspect of the intervention was the relational  
40 work conducted by therapists and the provision of social support through this. Findings from this  
41 study were that it was an important aspect of how the intervention operated: it facilitated  
42 participant and carer engagement in the intervention, supported aspects such as personalisation,  
43 and underpinned improved social support valued by participants and their carers. While relational  
44 and social support work may be recognised by practitioners as a common micro-level process, it is  
45 given comparatively little attention in published health intervention research (31, 32). This study  
46 suggests it is worthy of more attention in health intervention evaluation studies.  
47  
48  
49  
50

51 Complexity theory was used here to retrospectively explain the implementation of an intervention,  
52 which is less useful than predictive theory. However, the latter is challenging (10, 33). Rather than  
53 being predictive in a strong sense, complexity theory could inform programme theories and logic  
54 models to include commonly-occurring patterns such as self-organisation or feedback loops (34).  
55 This could be supported through developing less linear logic models and applying them flexibly as  
56 programme theory develops during an evaluation (3, 16). To this end, complexity theory could be  
57 more useful for process evaluation as a methodological theory to guide modelling, data collection  
58 and analysis, or an overarching framework, rather than a type of theory that explains how the world  
59  
60



works in a strongly predictive sense (9, 35). An alternative approach is to combine complexity approaches with other theoretical perspectives which explain agency or structures at different levels of a system (6, 8, 36). Both approaches require multiple, exploratory and flexible methods, including qualitative methods of sufficient depth, in order to identify informal, complex and unpredictable patterns (6, 7, 37). While complexity theory is increasingly employed, calls have been made for further examples of its application in process evaluation (1, 38). This article has provided one example of how complexity theory, particularly the concept of self-organisation, can be useful for providing insight into the implementation of an intervention that would have been missed by a process evaluation only focusing on formal intervention components.

### **Author contributions**

SMT designed and conducted the analysis of the focus group and therapy log data, oversaw the analysis and discussed themes from the interview data; and devised and drafted the paper; OK discussed themes developed from the focus group and therapy log data, and also commented on several drafts of the paper; KW analysed interview data and commented on several drafts of the paper; JO conducted the focus group, contributed to the study design and commented on several drafts of the paper; IL, JP, and BW contributed to the study design and commented on several drafts of the paper; LC oversaw the study design, discussed themes developed, and commented on several drafts of the paper.

### **Disclaimer**

KW is now supported by the NIHR Applied Research Collaboration East of England. The views and opinions expressed therein are those of the authors and do not necessarily reflect those of the HTA programme, Applied Research Collaboration South West Peninsula, Applied Research Collaboration East of England, NIHR, NHS or the Department of Health and Social Care.

### **Acknowledgements**

We thank all the participants with dementia and their family supporters who generously contributed their time to be part of this study. We also thank our experts by experience and staff at Alzheimer's Society for supporting the study. We would like to acknowledge the key roles played by Ho Yin Chan, Matthew Lewis and Julie Nixon who conducted the qualitative interviews, Dr Gill Toms who conducted some of the qualitative data analysis, and the trial therapists who provided the intervention.

### **Patient and Public Involvement**

For the GREAT trial, in which the process evaluation was embedded, experts by experience including Alzheimer's Society Research Volunteers were consulted at the set-up stage to inform participant information resources and trial procedures. As a result we made a number of amendments to the participant-facing documents and assessment measures. The inclusion of qualitative interviews and a focus group in the study design was at the suggestion of the experts by experience. They also provided insightful comments about the progress of the trial and contributed to developing a follow-up application for an implementation grant. Study participants were updated about trial progress through a regular newsletter.

**Trial registration**

ISRCTN21027481

**Ethics approval statement**

The study was reviewed by Wales Rec 5, which issued a favourable opinion on 25th June 2012 (Reference 12/WA/0185), and was approved by the Bangor University School of Psychology Research Ethics Committee.

**Reporting statement**

Methods and findings are reported in accordance with the Standards for Reporting Qualitative Research (SRQR) checklist (see appendix 1).

**Competing interests statement**

The authors declare they have no competing interests.

**Funding statement**

This work was supported by NIHR HTA, grant number 11/15/04.

**Data sharing statement**

Interview and focus group data were not deposited in an archive due to the small numbers of individuals participating in named sites, which could compromise anonymity through potentially identifiable information in transcripts. Therapy logs data were clinical notes and therefore not appropriate for depositing in an archive.

**References**

1. Moore G, Audrey S, Barker M, et al. Process Evaluation of Complex Interventions: Medical Research Council Guidance. London: MRC Population Health Science Research Network; 2014.
2. Eccles MP, Mittman BS. Welcome to Implementation Science. *Implementation Science*. 2006;1(1):1.
3. Rogers PJ. Using programme theory to evaluate complicated and complex aspects of interventions. *Evaluation*. 2008;14(1):29-48.
4. Clare L, Kudlicka A, Oyebode JR, et al. Goal-oriented cognitive rehabilitation for early-stage Alzheimer's and related dementias: the GREAT RCT. *Health Technol Assess*. 2019;23(10).
5. Clare L, Kudlicka A, Bayer A, et al. Goal-oriented cognitive rehabilitation in early-stage Alzheimer's and related dementias: results from a multi-centre, single-blind, randomised controlled trial (The GREAT trial). *Alzheimer's & Dementia: The Journal of the Alzheimer's Association*. 2017;13(7):P899-P900.
6. Walton M. Applying complexity theory: a review to inform evaluation design. *Eval Program Plann*. 2014;45:119-26.
7. Greenhalgh T, Papoutsi C. Studying complexity in health services research: desperately seeking an overdue paradigm shift. *BMC Med*. 2018;16(1):95.
8. Callaghan G. Evaluation and negotiated order: developing the application of complexity theory. *Evaluation*. 2008;14(4):399-411.

- 1
- 2
- 3
- 4 9. Kernick D. Wanted—new methodologies for health service research. Is complexity theory
- 5 the answer? *Fam Pract*. 2006;23(3):385-90.
- 6 10. Thompson DS, Fazio X, Kustra E, et al. Scoping review of complexity theory in health services
- 7 research. *BMC Health Services Research*. 2016;16(1):87.
- 8 11. Clark AM. What are the components of complex interventions in healthcare? Theorizing
- 9 approaches to parts, powers and the whole intervention. *Social Science & Medicine*. 2013;93:185-
- 10 93.
- 11 12. Braithwaite J, Churruca K, Long JC, et al. When complexity science meets implementation
- 12 science: a theoretical and empirical analysis of systems change. *BMC Med*. 2018;16(1):63.
- 13 13. Caffrey L, Wolfe C, McKeivitt C. Embedding research in health systems: lessons from
- 14 complexity theory. *Health Res Policy Syst*. 2016;14(1):54.
- 15 14. Chandler J, Rycroft-Malone J, Hawkes C, et al. Application of simplified Complexity Theory
- 16 concepts for healthcare social systems to explain the implementation of evidence into practice. *J*
- 17 *Adv Nurs*. 2016;72(2):461-80.
- 18 15. Trimmer JD. *Response of Physical Systems*. New York: Wiley & Sons; 1950.
- 19 16. Hawe P. Lessons from complex interventions to improve health. *Annual Review of Public*
- 20 *Health*. 2015;36(1):307-23.
- 21 17. May CR, Johnson M, Finch T. Implementation, context and complexity. *Implementation*
- 22 *Science*. 2016;11(1):141.
- 23 18. Hawe P, Shiell A, Riley T. Complex interventions: How “out of control” can a randomised
- 24 controlled trial be? *British Medical Journal*. 2004;328:1561-3.
- 25 19. Byrne D. What is complexity science? Thinking as a realist about measurement and cities and
- 26 arguing for natural history. *Emergence*. 2001;3(1):61-76.
- 27 20. Clare L, Bayer A, Burns A, et al. Goal-oriented cognitive rehabilitation in early-stage
- 28 dementia: study protocol for a multi-centre single-blind randomised controlled trial (GREAT). *Trials*.
- 29 2013;14(1):152.
- 30 21. Kudlicka A, Clare L. Cognitive rehabilitation in mild and moderate dementia. 2018. In: Oxford
- 31 *Research Encyclopedia of Psychology* [Internet].
- 32 22. Clare L, Kudlicka A. Goal-Oriented Cognitive Rehabilitation in Early-Stage Alzheimer’s and
- 33 related Dementias: Multi-Centre Single-Blind Randomised Controlled Trial (GREAT): Handbook for
- 34 Therapists. Bangor: University of Bangor; 2015.
- 35 23. Warmoth K, Morgan-Trimmer S, Kudlicka A, et al. Reflections on a personalized cognitive
- 36 rehabilitation intervention: Experiences of people living with dementia and their carers participating
- 37 in the GREAT trial. *Neuropsychological Rehabilitation*. 2020:1-19.
- 38 24. Braun V, Clarke V. Thematic analysis. In: Cooper H, editor. *APA Handbook of Research*
- 39 *Methods in Psychology* 2012. p. 57-71.
- 40 25. Ritchie J, Spencer L, O’Connor W. Carrying out qualitative analysis. In: Ritchie J, Lewis J,
- 41 editors. *Qualitative research practice: a guide for social science students and researchers*. London,
- 42 UK: SAGE Publications; 2003. p. 219-62.
- 43 26. Braun V, Clarke V. Using thematic analysis in psychology. *Qual Res Psychol*. 2006;3(2):77-
- 44 101.
- 45 27. Maxwell JA. *A Realist Approach for Qualitative Research*. London: Sage; 2012.
- 46 28. Mitchell G, Agnelli J. Person-centred care for people with dementia: Kitwood reconsidered.
- 47 *Nursing Standard*. 2015;30(7):46-50.
- 48 29. Delgado C, Upton D, Ranse K, et al. Nurses’ resilience and the emotional labour of nursing
- 49 work: An integrative review of empirical literature. *International Journal of Nursing Studies*.
- 50 2017;70:71-88.
- 51 30. Toomey E, Hardeman W, Hankonen N, et al. Focusing on fidelity: narrative review and
- 52 recommendations for improving intervention fidelity within trials of health behaviour change
- 53 interventions. *Health Psychology and Behavioral Medicine*. 2020;8(1):132-51.
- 54
- 55
- 56
- 57
- 58
- 59
- 60

- 1
- 2
- 3
- 4 31. Solman B, Clouston T. Occupational therapy and the therapeutic use of self. *British Journal*
- 5 *of Occupational Therapy*;79(8):514-6.
- 6 32. Rahkonen T, Eloniemi-Sulkava U, Paanila S, et al. Systematic Intervention for Supporting
- 7 *Community Care of Elderly People After a Delirium Episode. Int Psychogeriatr. 2001;13(1):37-49.*
- 8 33. Glanz K, Bishop DB. The role of behavioral science theory in development and
- 9 *implementation of public health interventions. Annual Review of Public Health. 2010;31(1):399-418.*
- 10 34. Ling T. Evaluating complex and unfolding interventions in real time. *Evaluation.*
- 11 *2012;18(1):79-91.*
- 12 35. Gear C, Eppel E, Koziol-McLain J. Advancing complexity theory as a qualitative research
- 13 *methodology. International Journal of Qualitative Methods. 2018;17(1).*
- 14 36. Westhorp G. Using complexity-consistent theory for evaluating complex systems. *Evaluation.*
- 15 *2012;18(4):405-20.*
- 16 37. Grant RL, Hood R. Complex systems, explanation and policy: implications of the crisis of
- 17 *replication for public health research. Critical Public Health. 2017;27(5):525-32.*
- 18 38. Brainard J, Hunter PR. Do complexity-informed health interventions work? A scoping review.
- 19 *Implementation Science. 2016;11(1):127.*
- 20
- 21
- 22
- 23
- 24
- 25
- 26
- 27
- 28
- 29
- 30
- 31
- 32
- 33
- 34
- 35
- 36
- 37
- 38
- 39
- 40
- 41
- 42
- 43
- 44
- 45
- 46
- 47
- 48
- 49
- 50
- 51
- 52
- 53
- 54
- 55
- 56
- 57
- 58
- 59
- 60

**Appendix 4: Methods and findings reported in accordance with the Standards for Reporting Qualitative Research (SRQR)**

|                                                                                   |                                                                                                                                                                                                                                                                                                                                           |
|-----------------------------------------------------------------------------------|-------------------------------------------------------------------------------------------------------------------------------------------------------------------------------------------------------------------------------------------------------------------------------------------------------------------------------------------|
| S1 Title                                                                          | The title indicates the type of study and theoretical focus of the paper                                                                                                                                                                                                                                                                  |
| S2 Abstract                                                                       | An abstract with background, methodological detail and conclusions has been included                                                                                                                                                                                                                                                      |
| S3 Problem formulation                                                            | The introductory section comments on limitations of process evaluations and outlines how complexity theory could improve process evaluations                                                                                                                                                                                              |
| S4 Purpose or research question                                                   | The research question is stated in the first paragraph of the introduction.                                                                                                                                                                                                                                                               |
| Methods                                                                           |                                                                                                                                                                                                                                                                                                                                           |
| S5 Qualitative approach and research paradigm                                     | The methods section states that the paper presents findings from a process evaluation embedded in a trial. The methods section describes the qualitative research as underpinned by a critical realist paradigm, and that qualitative interview and focus group data were analysed using a combined deductive and inductive approach.     |
| S6 Researcher characteristics and reflexivity                                     | The methods section states that the researchers analysing the data had no previous involvement in the study                                                                                                                                                                                                                               |
| S7 Context Setting/site and salient contextual factors                            | The introduction and background section provides information about the intervention setting, and includes references to more detailed publications about the study setting.                                                                                                                                                               |
| S8 Sampling strategy How and why research participants, documents, or events were | The methods section describes how participants were sampled. All available therapists were invited to a focus group, people with dementia were consecutively sampled across different sites, and therapy logs were sampled for around 10% of people receiving the intervention who had the best and worst outcomes from the intervention. |

|                                                                                                  |                                                                                                                                                                                                                                                                                                                                         |
|--------------------------------------------------------------------------------------------------|-----------------------------------------------------------------------------------------------------------------------------------------------------------------------------------------------------------------------------------------------------------------------------------------------------------------------------------------|
| S9 Ethical issues                                                                                | Details and reference number of the ethics approval are included                                                                                                                                                                                                                                                                        |
| S10 Data collection methods                                                                      | The timing and methods for data collection are described in detail in the methods section                                                                                                                                                                                                                                               |
| S11 Data collection instruments                                                                  | Data collection instruments are included in the appendices                                                                                                                                                                                                                                                                              |
| S12 Units of study                                                                               | Numbers and descriptions of participants are included                                                                                                                                                                                                                                                                                   |
| S13 Data processing                                                                              | Transcription and use of NVivo are noted in the methods section. All data were stored on secure university servers.                                                                                                                                                                                                                     |
| S14 Data analysis                                                                                | The method and stages of data analysis are described. The analysis of therapy logs drew on findings from the focus group – this is included in the description of methods.                                                                                                                                                              |
| S15 Techniques to enhance trustworthiness                                                        | The methods section states that focus group and interview data were collected by researchers without close involvement in the intervention. Data were analysed by researchers who had not been involved in the study up to that point (SMT and KW); developing themes from all datasets were discussed in meetings by the research team |
| Results/findings                                                                                 |                                                                                                                                                                                                                                                                                                                                         |
| S16 Synthesis and interpretation                                                                 | Findings are presented in relation to the theoretical concepts described in the introductory section.                                                                                                                                                                                                                                   |
| S17 Links to empirical data                                                                      | Quotes are included to substantiate the themes presented in the findings section                                                                                                                                                                                                                                                        |
| Discussion                                                                                       |                                                                                                                                                                                                                                                                                                                                         |
| S18 Integration with prior work, implications, transferability, and contribution(s) to the field | Findings are summarised in the discussion section. Findings are also related to future implementation of the intervention and implications for the theoretical perspective (complexity theory)                                                                                                                                          |

|                                                             |                                                                  |
|-------------------------------------------------------------|------------------------------------------------------------------|
| S19 Limitations Trustworthiness and limitations of findings | Limitations of the study are included in the discussion section. |
| S20 Conflicts of interest                                   | The authors have declared there are no conflicts of interest.    |
| S21 Funding                                                 | The funder and grant number is stated.                           |

For peer review only

## **Appendix 1: GREAT Focus Group Schedule - therapists' experience of providing goal-oriented cognitive rehabilitation for people with dementia (PwD) in GREAT**

### **Introduction - aims of the focus group**

The aim of this focus group is to explore therapists' experience of working with PwD to provide goal-oriented CR, to capture the nature of the interactions and the way in which the therapists deploy their skills to achieve the desired outcomes. We will use the results to inform the process of educating others on how to implement goal-oriented CR and to consider ways to further enhance CR in future.

- We value your open and honest responses. Please feel free to share your point of view even if it differs from what others have said. Every person's experiences and opinions are important.
- We are tape recording to capture everything you have to say, but we won't identify anyone by name in the report. The recording will be transcribed by someone from outside the team and anonymised.

### **General views on the process of providing goal-oriented cognitive rehabilitation – 10 min**

How do you find the process of providing goal-oriented CR in GREAT?

What is it like to provide goal-oriented CR in GREAT?

### **Things that have worked well in providing goal-oriented CR – 10 min**

What are the things that work well for you in the therapy process?

Which aspects do you look forward to most?

### **Challenges or difficulties in providing goal-oriented CR –10 min**

What aspects of your work on providing goal-oriented CR in GREAT are most challenging?

What are the difficulties that you encounter when providing goal-oriented CR in GREAT?

### **Additional questions on the process of providing goal-oriented cognitive rehabilitation – 15 min**

What sort of things have you learnt so far about working on cog rehab goals from working on the trial?

How do you find the role of the carer during the therapy process?

Has anything surprised you about the process?

Do you have hunches about what sort of people seem to benefit most?

If you were in charge, is there anything you'd be tempted to change about the way we have set up the study regarding working on the goals?

What do you think about the length of sessions?

What do you think about the overall length of the therapy?

How do you find training and supervision provided in GREAT?

If you were providing top tips to a therapist, what would be the key things you'd advise them to look out for or do?

### **Closing question**

Before we finish the focus group, is there anything that we have missed? Is there anything anyone would like to say about their experience of providing goal-oriented CR in GREAT?



1  
2  
3  
4  
5  
6  
7  
8  
9  
10  
11  
12  
13  
14  
15  
16  
17  
18  
19  
20  
21  
22  
23  
24  
25  
26  
27  
28  
29  
30  
31  
32  
33  
34  
35  
36  
37  
38  
39  
40  
41  
42  
43  
44  
45  
46  
47  
48  
49  
50  
51  
52  
53  
54  
55  
56  
57  
58  
59  
60

**Summing up and moving on**

*Summarise main points of the discussion, balance negative comments with positive comments.  
Thank everyone for sharing their comments on providing goal-oriented CR in GREAT and end the focus group.*

For peer review only

## Appendix 2: Topics recorded by therapists in therapy logs

| <u>Therapy log topic</u>    | <u>Therapist ratings or comments recorded under relevant sessions</u>                                                                                                                                                                                                                                                                                                                                                                                                                                                                                                                                             |
|-----------------------------|-------------------------------------------------------------------------------------------------------------------------------------------------------------------------------------------------------------------------------------------------------------------------------------------------------------------------------------------------------------------------------------------------------------------------------------------------------------------------------------------------------------------------------------------------------------------------------------------------------------------|
| Compliance                  | Whether given session was completed                                                                                                                                                                                                                                                                                                                                                                                                                                                                                                                                                                               |
| Relationships               | The relationship the therapist developed with the participant and carer, and the relationship between the participant and carer                                                                                                                                                                                                                                                                                                                                                                                                                                                                                   |
| Goals                       | Participant and carer responsiveness to the solution-focused problem-solving approach<br>Goal 1: agreed strategies, between-session practice, and progress<br>Goal 2: agreed strategies, between-session practice, and progress<br>Goal 3: agreed strategies, between-session practice, and progress<br>Any adjustments or modifications to goal statements provided at baseline<br>In-session goal attainment ratings by participant, carer and therapist (sessions 10 and 14) and comments on these<br>Selection of goal attainment scaling indicators for each goal (sessions 10 and 14) and comments on these |
| Activity levels             | Review of activity levels, plan for behavioural activation to increase activity engagement, and comments on progress                                                                                                                                                                                                                                                                                                                                                                                                                                                                                              |
| Compensatory strategy use   | Review of current use of compensatory strategies and environmental adaptations, plan to develop strategy use, and comments on progress                                                                                                                                                                                                                                                                                                                                                                                                                                                                            |
| Restorative strategy use    | Response to information about restorative strategies, plan for developing restorative strategy use, and comments on progress                                                                                                                                                                                                                                                                                                                                                                                                                                                                                      |
| Attention and concentration | Strategies introduced to help maintain attention and concentration, and progress with applying these strategies                                                                                                                                                                                                                                                                                                                                                                                                                                                                                                   |

|    |                   |                                                                                 |
|----|-------------------|---------------------------------------------------------------------------------|
| 1  |                   |                                                                                 |
| 2  |                   |                                                                                 |
| 3  |                   |                                                                                 |
| 4  |                   |                                                                                 |
| 5  | Anxiety           | Current use of anxiety management strategies, carer's perspective on the        |
| 6  | management        | participant's use of these strategies, introduction or refinement of anxiety    |
| 7  |                   | management technique(s), and progress with use of anxiety management            |
| 8  |                   | strategies                                                                      |
| 9  |                   |                                                                                 |
| 10 |                   |                                                                                 |
| 11 |                   |                                                                                 |
| 12 |                   |                                                                                 |
| 13 | Carer well-being  | Review with carer, and plan for enhancing carer well-being                      |
| 14 |                   |                                                                                 |
| 15 |                   |                                                                                 |
| 16 |                   |                                                                                 |
| 17 | Carer involvement | The extent to which the carer was engaged in supporting the process of          |
| 18 |                   | therapy                                                                         |
| 19 |                   |                                                                                 |
| 20 |                   |                                                                                 |
| 21 |                   |                                                                                 |
| 22 |                   |                                                                                 |
| 23 | Ending therapy    | Plans for maintaining progress after the end of the intervention, and review of |
| 24 |                   | other sources of help and support                                               |
| 25 |                   |                                                                                 |
| 26 |                   |                                                                                 |
| 27 |                   |                                                                                 |
| 28 |                   |                                                                                 |
| 29 | Experience of     | Review with the participant and with the carer, and therapist reflection on the |
| 30 | therapy           | process of therapy; therapist confidence in addressing participants' goals      |
| 31 |                   | (following the nine month follow-up)                                            |
| 32 |                   |                                                                                 |
| 33 |                   |                                                                                 |
| 34 |                   |                                                                                 |
| 35 |                   |                                                                                 |
| 36 |                   |                                                                                 |
| 37 |                   |                                                                                 |
| 38 |                   |                                                                                 |
| 39 |                   |                                                                                 |
| 40 |                   |                                                                                 |
| 41 |                   |                                                                                 |
| 42 |                   |                                                                                 |
| 43 |                   |                                                                                 |
| 44 |                   |                                                                                 |
| 45 |                   |                                                                                 |
| 46 |                   |                                                                                 |
| 47 |                   |                                                                                 |
| 48 |                   |                                                                                 |
| 49 |                   |                                                                                 |
| 50 |                   |                                                                                 |
| 51 |                   |                                                                                 |
| 52 |                   |                                                                                 |
| 53 |                   |                                                                                 |
| 54 |                   |                                                                                 |
| 55 |                   |                                                                                 |
| 56 |                   |                                                                                 |
| 57 |                   |                                                                                 |
| 58 |                   |                                                                                 |
| 59 |                   |                                                                                 |
| 60 |                   |                                                                                 |

### Appendix 3: Interview schedule for the person with dementia

The interview will take form of a conversation and the interviewer will encourage the participant to talk freely about the experience of the cognitive rehabilitation intervention.

The researcher will begin by re-establishing consent for the interview and for audio-recording.

The researcher may begin with some general conversation to build rapport as appropriate.

The researcher will introduce the main part of the interview by saying:

*You've been taking part in the GREAT study and having visits from the therapist, and I'd like to know your views on what it was like. I'm interested in what it was like to take part in the study and how you found the visits from the therapist.*

#### 1. Experiences

The researcher will explore the participant's experiences and feelings starting with general questions:

*How did you find the therapist's visits over the past few weeks?*

*What was it like to work with the therapist on your goals?*

More specific information will then be elicited using prompts such as the following:

*What were the more enjoyable things about your work with the therapist?*

*What were the less enjoyable things about your work with the therapist?*

*What aspects of your work with the therapist were more/less helpful?*

*Did you find it hard work to take part in the therapy?*

*What aspects of your work with the therapist were most challenging?*

The interviewer will encourage the person to give specific examples, where possible.

#### 2. Outcomes

The researcher will explore the impact of taking part in cognitive rehabilitation on the person's everyday life and self-perceptions.

*What difference (if any) has your work with the therapist made to your daily life?*

*Has the experience changed anything in the way you think about your dementia/about yourself/about the future?*

*Has the experience changed anything in the way you relate to your carer/family?*

The researcher will draw on positive comments from the participant to end the conversation on a positive note.

# BMJ Open

## Implementation processes in a cognitive rehabilitation intervention for people with dementia: A complexity-informed qualitative analysis

|                                 |                                                                                                                                                                                                                                                                                                                                                                                                                                                                                                                                                                                                                                                                                                                                                                     |
|---------------------------------|---------------------------------------------------------------------------------------------------------------------------------------------------------------------------------------------------------------------------------------------------------------------------------------------------------------------------------------------------------------------------------------------------------------------------------------------------------------------------------------------------------------------------------------------------------------------------------------------------------------------------------------------------------------------------------------------------------------------------------------------------------------------|
| Journal:                        | <i>BMJ Open</i>                                                                                                                                                                                                                                                                                                                                                                                                                                                                                                                                                                                                                                                                                                                                                     |
| Manuscript ID                   | bmjopen-2021-051255.R1                                                                                                                                                                                                                                                                                                                                                                                                                                                                                                                                                                                                                                                                                                                                              |
| Article Type:                   | Original research                                                                                                                                                                                                                                                                                                                                                                                                                                                                                                                                                                                                                                                                                                                                                   |
| Date Submitted by the Author:   | 19-Aug-2021                                                                                                                                                                                                                                                                                                                                                                                                                                                                                                                                                                                                                                                                                                                                                         |
| Complete List of Authors:       | Morgan-Trimmer, Sarah; University of Exeter, College of Medicine and Health<br>Kudlicka, Aleksandra; University of Exeter, College of Medicine and Health<br>Warmoth, Krystal ; University of Hertfordshire, School of Health and Social Work & NIHR Applied Research Collaboration East of England<br>Leroi, Iracema; Global Brain Health Institute, School of Medicine<br>Oyebode, Jan; University of Bradford, Centre for Applied Dementia Studies<br>Pool, Jackie; QCS Quality Compliance Systems, Dementia Pal Ltd<br>Woods, Robert; Bangor University, Dementia Services Development Centre Wales, School of Health Sciences<br>Clare, Linda; University of Exeter, College of Medicine and Health & NIHR Applied Research Collaboration South-West Peninsula |
| <b>Primary Subject Heading</b>: | Health services research                                                                                                                                                                                                                                                                                                                                                                                                                                                                                                                                                                                                                                                                                                                                            |
| Secondary Subject Heading:      | Qualitative research                                                                                                                                                                                                                                                                                                                                                                                                                                                                                                                                                                                                                                                                                                                                                |
| Keywords:                       | Dementia < NEUROLOGY, HEALTH SERVICES ADMINISTRATION & MANAGEMENT, QUALITATIVE RESEARCH                                                                                                                                                                                                                                                                                                                                                                                                                                                                                                                                                                                                                                                                             |
|                                 |                                                                                                                                                                                                                                                                                                                                                                                                                                                                                                                                                                                                                                                                                                                                                                     |

SCHOLARONE™  
Manuscripts

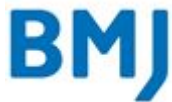

I, the Submitting Author has the right to grant and does grant on behalf of all authors of the Work (as defined in the below author licence), an exclusive licence and/or a non-exclusive licence for contributions from authors who are: i) UK Crown employees; ii) where BMJ has agreed a CC-BY licence shall apply, and/or iii) in accordance with the terms applicable for US Federal Government officers or employees acting as part of their official duties; on a worldwide, perpetual, irrevocable, royalty-free basis to BMJ Publishing Group Ltd ("BMJ") its licensees and where the relevant Journal is co-owned by BMJ to the co-owners of the Journal, to publish the Work in this journal and any other BMJ products and to exploit all rights, as set out in our [licence](#).

The Submitting Author accepts and understands that any supply made under these terms is made by BMJ to the Submitting Author unless you are acting as an employee on behalf of your employer or a postgraduate student of an affiliated institution which is paying any applicable article publishing charge ("APC") for Open Access articles. Where the Submitting Author wishes to make the Work available on an Open Access basis (and intends to pay the relevant APC), the terms of reuse of such Open Access shall be governed by a Creative Commons licence – details of these licences and which [Creative Commons](#) licence will apply to this Work are set out in our licence referred to above.

Other than as permitted in any relevant BMJ Author's Self Archiving Policies, I confirm this Work has not been accepted for publication elsewhere, is not being considered for publication elsewhere and does not duplicate material already published. I confirm all authors consent to publication of this Work and authorise the granting of this licence.

1  
2  
3 **Implementation processes in a cognitive rehabilitation intervention for people with dementia:**  
4 **A complexity-informed qualitative analysis**  
5

6 Sarah Morgan-Trimmer, College of Medicine and Health, University of Exeter, St Lukes Campus,  
7 Heavitree Road, Exeter, EX1 2LU, UK. Email: [s.morgan-trimmer@exeter.ac.uk](mailto:s.morgan-trimmer@exeter.ac.uk) (corresponding author)  
8  
9

10 Aleksandra Kudlicka, College of Medicine and Health, University of Exeter, Exeter, UK  
11

12 Krystal Warmoth, Centre for Research in Public Health and Community Care (CRIPACC), School of  
13 Health and Social Work, University of Hertfordshire; NIHR Applied Research Collaboration East of  
14 England, UK  
15

16 Iracema Leroi, Global Brain Health Institute, Trinity College Dublin, Dublin, Ireland  
17

18 Jan Oyebode: Centre for Applied Dementia Studies, University of Bradford, UK  
19

20 Jackie Pool, Dementia Pal Ltd, QCS Quality Compliance Systems, UK  
21  
22

23 Robert Woods, Dementia Services Development Centre Wales, School of Health Sciences, Bangor  
24 University, Bangor, UK  
25

26 Linda Clare: College of Medicine and Health, University of Exeter, Exeter, UK; NIHR Applied Research  
27 Collaboration South-West Peninsula, UK  
28  
29

30  
31 **Wordcount:** 6314  
32  
33  
34  
35  
36  
37  
38  
39  
40  
41  
42  
43  
44  
45  
46  
47  
48  
49  
50  
51  
52  
53  
54  
55  
56  
57  
58  
59  
60

## Abstract

**Objectives:** Health care is often delivered through complex interventions. Understanding how to implement these successfully is important for optimising services. This article demonstrates how the complexity theory concept of 'self-organisation' can inform implementation, drawing on a process evaluation within a randomised controlled trial of the GREAT intervention which compared a cognitive rehabilitation intervention for people with dementia with usual treatment.

**Design:** A process evaluation examined experiences of GREAT therapists and participants receiving the intervention, through thematic analysis of a focus group with therapists and interviews with participants and their carers. Therapy records of participants receiving the intervention were also analysed using adapted framework analysis. Analysis adopted a critical realist perspective and a deductive-inductive approach to identify patterns in how the intervention operated.

**Setting:** The GREAT intervention was delivered through home visits by therapists, in eight regions in the UK.

**Participants:** Six therapists took part in a focus group, interviews were conducted with 25 participants and 26 carers, and therapy logs for 50 participants were analysed.

**Intervention:** A 16-week cognitive rehabilitation programme for people with mild-to-moderate dementia.

**Results:** 'Self-organisation' of the intervention occurred through adaptations made by therapists. Adaptations included simplifying the intervention for people with greater cognitive impairment, and extending it to meet additional needs. Relational work by therapists produced an emergent outcome of 'social support'. Self-organised aspects of the intervention were less visible than formal components, but were important aspects of how it operated during the trial. This understanding can help to inform future implementation.

**Conclusions:** Researchers are increasingly adopting complexity theory to understand interventions. This study extends the application of complexity theory by demonstrating how 'self-organisation' was a useful concept for understanding aspects of the intervention that would have been missed by focusing on formal intervention components. Analysis of self-organisation could enhance future process evaluations and implementation studies.

## Article Summary

### Strengths and limitations of this study

- This study adopted an in-depth, theoretically-informed qualitative analysis to understand implementation processes in a complex intervention
- The final stage of analysis drew on three complementary datasets to develop a holistic understanding of how a complex intervention operated
- A limitation of the study is that it only reports therapist and participant perceptions of how the intervention operated; researcher observations of therapy sessions were not conducted.
- This study included a small number of focus group participants, interviewees and therapy records; the study was designed to produce theoretical generalisability through in-depth analysis rather than a large sample size.



## Background

### Introduction

This article discusses the application of the complexity theory concept of ‘self-organisation’ for understanding implementation. Implementation, defined here as “*the process through which interventions are delivered, and what is delivered in practice*” (1, pg. 8), is an important element of process evaluation. This is distinct from the definition of implementation within the field of ‘implementation science’ which “*is the scientific study of methods to promote the systematic uptake of research findings and other evidence-based practices into routine practice*” (2, pg. 1). While there is overlap between the two definitions, process evaluations tend to focus on ‘*the quality and quantity of what is actually delivered during the evaluation*’ (1) and it is this focus we adopt in this article. It reports findings from a process evaluation which addressed several research questions, including “*how was the intervention implemented?*”. Process evaluations may be the first opportunity to closely study, refine and optimise implementation of a new intervention. Findings on implementation can then inform wider roll-out of interventions at the post-trial stage (1).

Existing approaches to implementation employed by process evaluations face two main limitations. First, process evaluations are often structured using logic models which represent the underlying theory of how an intervention, including implementation processes, work (3). Logic models usefully provide a simple-enough model on which to base an evaluation, but in doing so they tend to conceptualise the world in a relatively linear, mechanistic way. Second, logic models focus attention on whether a certain process happened, rather than unexpected events, because they represent ideal versions of what researchers hypothesise will occur. Within this approach, implementation of the intervention tends to be examined in terms of fidelity to this ideal version. However, during implementation, some components of the intervention may not have been delivered as anticipated, additional components may have been introduced, and components may have interacted with each other or contextual factors in unexpected ways. These aspects may be missed if data are only collected on components identified in logic models. This article discusses the application of the complexity theory concept of ‘self-organisation’ for improving understanding of how complex health interventions are implemented. It examines how it can be applied through analysing process evaluation data from a trial of a community-based cognitive rehabilitation (CR) intervention for people with dementia (4, 5).

### Complexity theory and self-organisation

Complexity theory has been increasingly advocated as an alternative theoretical lens for understanding complex interventions, and is being increasingly applied across a range of healthcare research areas and evaluation studies (6-12). It theorises systems of different types – social, physical, biological – as constantly self-organising and unfolding. A complex system cannot be understood only in terms of its parts, as a complicated machine for example, where the causal powers of the system are explained by its components (6, 9, 13). Processes occur in complex systems through the dynamic, non-linear relations between components at different levels as interacting parts of a system, producing effects in unpredictable ways (14-16). Complexity theory encompasses a range of concepts which describe how patterns occur, including self-organisation, feedback loops and

1  
2  
3 emergence (10, 14, 15, 17). Complex health interventions can be conceptualised as complex systems  
4 since they incorporate multiple interacting elements such as humans (as active and responsive  
5 agents), organisations, materials, rules, policies and so on, through which these patterns may occur  
6 (6, 13, 14). Complexity approaches also conceptualise the system within which an intervention is  
7 introduced as complex, unfolding, interacting with and changed by the intervention: systems are  
8 nested within other systems and cannot be isolated (6, 15, 17-19).  
9  
10

11  
12 This article draws on the complexity concept of 'self-organisation', and the additional concepts of  
13 'emergence' and 'feedback loops', and explores their application to studying implementation. 'Self-  
14 organisation' refers to interacting elements of a system, such as practitioners, who behave or make  
15 individual micro-level decisions in response to other elements of a system (such as clients) in a way  
16 which produces patterns or order at a higher level (10, 15). This order is produced in a bottom-up  
17 way since it occurs as the result of individual decisions which are not coordinated, rather than  
18 through top-down instructions. The order which is created is 'emergent', as it appears at the overall  
19 intervention level and occurs somewhat unpredictably. A common form of self-organisation occurs  
20 through feedback loops, for example where practitioners tailor how they deliver an intervention in  
21 response to client reactions to the intervention (13).  
22  
23  
24

25  
26 Self-organisation can operate within or beyond the formal design of an intervention. Some  
27 interventions are designed to be partly self-organising, where the practitioner is expected to adapt  
28 the intervention according to individual client needs for example, as long as the core functions of the  
29 intervention are delivered (20, 21). The core functions relate to ways in which the intervention  
30 activities produce mechanisms of action, and must be retained for an intervention to be effective,  
31 while the activities (form) of an intervention may be adapted (22). Other forms of self-organisation  
32 occur outside of the prescribed parameters of the intervention, through deviation from protocols for  
33 example. Through micro-level decisions about adaptations, practitioner behaviours result in self-  
34 organisation as their patterns of behaviour at a collective level shape what intervention is actually  
35 delivered. Self-organisation is not commonly theorised as being part of implementation processes,  
36 yet could significantly influence implementation and, in turn, intervention outcomes.  
37  
38  
39  
40

41  
42 While complexity theory may explain the real world more adequately than linear models, there are  
43 challenges in applying it within a process evaluation. Complexity theory is a collection of related  
44 concepts which are often presented in overlapping rather than standardised lists, and does not have  
45 an agreed definition (10). It is not yet a consolidated theory in that there are questions about how  
46 concepts are related to each other (9, 17). Complexity theory also tends to emphasise the  
47 unpredictability of outcomes and produce post-hoc explanations rather than having strong  
48 predictive power (10, 23, 24). This is somewhat at odds with the aim of process evaluation, and  
49 research more generally, to identify generalisable patterns, 'demi-regularities' or predictive theories  
50 (6). However, the emphasis on unpredictability varies within the family of complexity theory  
51 approaches (6). This article examines the application of complexity concepts, particularly 'self-  
52 organisation', in a process evaluation and reflects on its use for understanding the implementation  
53 of complex health interventions.  
54  
55  
56

57  
58 The paper draws on several datasets which answered a set of related questions for the process  
59 evaluation about how the intervention operated. The research questions were: how was the  
60

1  
2  
3 intervention delivered; what was the feasibility of delivering the intervention; was the intervention  
4 delivered with fidelity; what were the mechanisms of impact; what influenced treatment outcomes;  
5 what were participant experiences of the intervention; and what were therapists' experiences of  
6 delivering the intervention? The analysis reported here answered a further research question: how  
7 did the way the intervention was delivered influence whether and how participants benefitted? The  
8 broad aim of a process evaluation is to explain how an intervention operates to produce its  
9 outcomes, but process evaluations often only address different elements of an intervention  
10 separately. This approach, drawing on complexity concepts, was an attempt to conduct a more  
11 holistic analysis.  
12  
13  
14  
15  
16  
17

### 18 ***The GREAT trial***

19  
20  
21 The GREAT study was a randomised controlled trial, with an embedded process evaluation, of a CR  
22 intervention for people with a clinical diagnosis of dementia (referred to here as 'participants') and  
23 a Mini Mental State Examination (MMSE) score of  $\geq 18$  points indicating mild to moderate cognitive  
24 impairment (25, 26). It was delivered in eight regions in the UK. The main purpose of the  
25 intervention was to improve ability to carry out everyday activities in the areas the participant  
26 chose to target. The intervention involved identifying with the participant personally relevant and  
27 significant goals related to daily activities, and then working together to develop and implement a  
28 set of strategies to enable the person to achieve the desired outcomes. The primary outcome was  
29 participant-reported progress towards participant-identified goals at three months. It was  
30 delivered by a practitioner (eight of whom were occupational therapists and one a nurse) during  
31 one-hour home visits, ideally with a carer also present at part of the session. The participant, with  
32 carer support, was encouraged to implement agreed changes in daily routines and practise  
33 strategies between visits. Ten visits were delivered over three months, followed by four  
34 maintenance sessions over six months. The intervention was detailed in a practitioner handbook  
35 which included a structured protocol (27); the core component of sessions was to work towards  
36 personalised goals, supplemented by strategies to improve attention and concentration,  
37 compensatory strategies, and restorative strategies for retaining new information or improving  
38 recall. Additional optional components included anxiety management, increasing activity levels,  
39 discussing carer well-being, and signposting to other services. Training sessions and regular group  
40 and individual supervision was provided for the therapists. The intervention is conceptualised here  
41 as a complex intervention as it had multiple interacting components, addressed difficulties  
42 encountered in dementia for both participants and carers, was a tailored intervention and targeted  
43 multiple outcomes (28). Full details of the intervention, trial methods and trial outcomes have been  
44 published (4, 5, 25, 29).  
45  
46  
47  
48  
49  
50  
51  
52

53 The intervention was personalised in that participants could identify up to three goals they wished  
54 to work towards and the therapists applied CR strategies to address these. The intervention was  
55 also designed to be responsive to participant needs in that therapists had some flexibility to apply  
56 elements of the intervention such as anxiety management, depending on the needs of the  
57 participant and their personal and social contexts. The handbook reflected this balance between  
58 structure and flexibility, for example:  
59  
60

1  
2  
3  
4  
5  
6  
7  
8  
9  
10  
11  
12  
13  
14  
15  
16  
17  
18  
19  
20  
21  
22  
23  
24  
25  
26  
27  
28  
29  
30  
31  
32  
33  
34  
35  
36  
37  
38  
39  
40  
41  
42  
43  
44  
45  
46  
47  
48  
49  
50  
51  
52  
53  
54  
55  
56  
57  
58  
59  
60

*The intervention in a trial needs to follow a structured protocol, as summarised in Table 1 below. However, some flexibility will be needed as participants will have varying needs and preferences and will progress at different rates.*

GREAT Handbook for Therapists (27: 40)

This article examines the implementation of the GREAT intervention, where the intervention is conceptualised as a complex intervention designed to incorporate a degree of self-organisation through its person-centred design and requirement to be responsive to the contexts, needs and preferences of people with dementia.

## Methods

This article draws on findings from three datasets which were analysed for the GREAT trial process evaluation(4). Methods and findings are reported in accordance with the Standards for Reporting Qualitative Research (SRQR) checklist (Appendix 1). A focus group and analysis of therapy logs from the intervention examined the perceptions and experiences of therapists about how the intervention was delivered, feasibility of the intervention, fidelity to the intervention protocol, and perceived factors affecting treatment outcomes. A set of interviews explored the perceptions and experiences of the intervention by participants and their carers and whether and how any impact from the intervention was experienced by this group. Written informed consent was obtained at the beginning of the trial. Trial researchers and therapists were trained to monitor ongoing consent and identify and respond to any indication of possible withdrawal of consent. Researchers began participant and carer interviews by re-establishing consent. A critical realist perspective was adopted in the data analysis to identify causal patterns of how the intervention operated (a realist ontology) while allowing that perceptions of the intervention may differ between participants (a relativist epistemology). To this end, the three datasets were initially analysed with an overall focus on participant perspectives, whether these were categorised according to deductive categories identified from previous research or inductively developed. Additional interpretive work was conducted using a graphic to relate themes from the focus group analysis to each other, to draw out a more realist explanation of the dynamic relationships between different elements of the intervention. In a second stage, a realist-oriented analysis of how the intervention operated was conducted though deductively applying constructs from the complexity literature to the initial findings from the three datasets.

### Focus Group

A focus group was conducted with all six therapists who were in post at the time, at the end of the first year of the intervention, to examine their experiences of the intervention (see Appendix 2 for schedule). The focus group was conducted as part of the second annual training event for the trial therapists. The discussion was facilitated by co-author and trial co-investigator JO. She had a thorough understanding of the intervention but was not involved in supervising the therapists, which facilitated an open discussion. It was digitally recorded, transcribed verbatim and uploaded to NVivo 11. A thematic analysis, underpinned by a critical realist perspective, was conducted by the lead author, SMT, who had not been involved in the study up to this point (30). Data were initially

1  
2  
3 coded using a combined inductive-deductive approach, drawing on the dementia literature  
4 informing the GREAT trial (4). Themes were then developed, after first summarising the codes, and  
5 graphics were developed to represent and analyse themes at a more interpretive level. This article  
6 draws on three themes relevant to implementation: the perceived influence of the severity of  
7 dementia; adaptation work of therapists in response to their perceptions of the severity of  
8 dementia; and the relational work implemented by therapists and the outcomes this  
9 produced. These themes are more fully described in the findings section.  
10  
11  
12

### 13 ***Analysis of therapy logs***

14  
15 Therapy logs were maintained for every participant for each of the 14 sessions and included detail  
16 about each intervention component, such as progress towards goals (see Appendix 3 for categories  
17 included in therapy logs). These logs were analysed by SMT to try to identify factors which might  
18 explain how participants benefitted from the intervention, or not. Therapy logs were analysed to  
19 compare the 25 participants with the highest-score primary outcomes (the 'good outcomes' group)  
20 and the 25 participants with the lowest-score primary outcomes (the 'poor outcomes' group), out of  
21 the intervention arm population of 281 individuals. The primary outcome was participant-reported  
22 goal attainment at 3 months post-randomisation, measured using the Bangor Goal-Setting Interview  
23 (BGSi) (4). This measurement was undertaken through a home visit by a researcher who was blinded  
24 to the trial arm of the participant.  
25  
26  
27  
28

29 An adapted framework analysis method was employed, using deductive categories identified in the  
30 focus group findings and also inductive categories where novel factors were identified (31). The  
31 analysis aimed to identify differences in patterns in each group, paying attention to both qualitative  
32 and quantitative differences. First, each component for each session was summarised and compared  
33 between the 'best outcomes' and 'poor outcomes' groups. Second, the trajectory of each  
34 participant's progress through the intervention was summarised and then compared by group.  
35 Third, a 'negative case analysis' was conducted to explore factors which did not fit with the general  
36 patterns emerging from the first two stages of the analysis.  
37  
38  
39  
40

### 41 ***Interviews***

42 Face-to-face, semi-structured interviews were conducted with 25 participants and 26 carers at nine  
43 months post-intervention, to explore their experiences of the intervention (see Appendix 4 for  
44 interview schedule). They were consecutively sampled across three different sites (North  
45 Wales, South Wales and Greater Manchester) where the intervention was taking place and where  
46 there was a research assistant not otherwise involved in the trial available to complete the  
47 interviews. Participants and carers were interviewed separately wherever possible, starting with the  
48 person with dementia. Interviewers took a photograph of the therapist on the visit to prompt the  
49 participant's memory of the therapy sessions. If the participant was struggling to recall the therapy  
50 sessions, the interview was completed jointly with the carer. All interviews were audio-recorded,  
51 transcribed verbatim and uploaded to NVivo 11 (4).  
52  
53  
54  
55

56 Data were analysed using thematic analysis which was underpinned by a critical realist position and  
57 which employed an inductive approach to identifying and exploring patterns of meaning (32, 33).  
58 Data were initially coded by four researchers, and then organised into meaningful groups by KW and  
59 SMT. Related themes were clustered together and organised into an overall thematic map.  
60

1  
2  
3  
4 Detailed methods and findings of the focus group, therapy log analysis and interviews have been  
5 reported (4). In a last stage of analysis, themes from the focus group analysis were interpreted in  
6 relation to core concepts in the complexity literature. The core concepts considered were:  
7 interacting elements, unpredictability, self-organisation, emergence, non-linearity, fuzzy boundaries,  
8 feedback loops and being 'more than the sum of its parts' (9, 10, 14, 15, 17). These themes were  
9 then further developed through triangulation with findings from the interviews and therapy log  
10 analysis. Findings on intervention implementation are reported below.  
11  
12  
13  
14

## 15 Results

16  
17 Findings presented here explain how the intervention operated as a complex system, and how some  
18 aspects of implementation occurred in a self-organising pattern, through adaptation behaviours of  
19 therapists. These were: simplifying the intervention for people with greater cognitive impairment;  
20 providing additional support in response to participant needs; and conducting relational work to  
21 engage participants, which produced an emergent outcome of increased social support.  
22  
23  
24

### 25 *Self-organisation through adaptive response*

26  
27 The GREAT intervention incorporated self-organisation in its design: therapists were required to  
28 select CR strategies appropriate for individuals and their social context, and tailor the intervention to  
29 individuals' needs and preferences. Participants and carers reported experiencing the intervention  
30 as personalised:  
31  
32  
33

34 *[Goals] were always relevant to ... obviously relevant to the issues that [therapist] wanted to*  
35 *raise ... And also relevant to, the issues that were important for [person with dementia] ... she*  
36 *worked at a pace that was good for him as well.*  
37

38 (Interview, Carer 5)  
39

40  
41 Therapists reported that they adapted the intervention in response to their perception that  
42 participants with greater cognitive impairment (within the trial population range) were less likely to  
43 engage in and benefit from the intervention. For example, therapists observed that these  
44 participants had more difficulty setting relevant goals or remembering them. Therapists' notes for  
45 participants in the 'poor outcomes' group also described features which could be attributable to  
46 greater cognitive impairment: a tendency to set more basic-level goals; being more likely to give up  
47 on a goal; lower levels of motivation; being more withdrawn during sessions; and having less  
48 awareness regarding their condition.  
49  
50  
51

52  
53 Therapists responded to participants with greater cognitive impairment through adapting their  
54 delivery of the intervention for these participants in several ways. First, because it was difficult for  
55 these participants to absorb information, therapists would slow down the pace of delivery and only  
56 deliver what they thought were the most relevant sections:  
57  
58

59 *Therapist 5: I was almost going at a snail's pace, because I realised it was far too much*  
60 *information to dish out, and I was literally cherry-picking the bits I thought were relevant so I*

1  
2  
3 *could get through the goals and get them rated, and just literally [Several people agreeing]*  
4 *Therapist 4: And, sometimes you do have to cherry pick don't you? [Several people agreeing].*  
5  
6 (Therapist focus group)  
7

8 Therapists also tailored the timing of material, moving some supplementary topics to an alternative  
9 session for example:  
10

11  
12 *Therapist 6: But there's too much information for me, so let alone someone who has to take a*  
13 *while, or so I've started moving things away*  
14 *Therapist 4: Oh, I've moved things very early on, I moved the anxiety stuff, unless it's the*  
15 *glaring, big problem, I move anxiety from week 1 to week 2 because it's too much information.*  
16  
17 (Therapist focus group)  
18  
19

20 In addition, therapists reported that they simplified some of the language in the handbook:  
21

22  
23 *Therapist 7: The 'restorative' and 'compensatory', that's too jargon-y, and too heavy for the*  
24 *person, not all, but some of the people with dementia...*  
25 *Therapist 2: Yes, I've had to change the words to 'methods', because 'strategies' just scares*  
26 *them.*  
27  
28 (Therapist focus group)  
29

30 In these ways, therapists made individual, micro-level decisions to ensure the intervention matched  
31 the needs of participants with greater cognitive impairment, and sometimes adapted the content  
32 from the intervention protocol (27). This is an example of self-organisation operating in a feedback  
33 loop, where practitioners adapted an intervention according to the perceived capacity of people  
34 with dementia. Through this adaptation work, they shaped the nature of intervention for some  
35 participants.  
36  
37  
38

### 39 **Self-organisation through extending the intervention**

40  
41 Carers were important for the delivery of the intervention because they supported the practice of  
42 new techniques, and could also impact on participant motivation. Difficulty engaging some carers  
43 was noted in the therapy logs and, in the focus group, therapists reported additional efforts they  
44 made to engage carers. For example, therapists sometimes adjusted the time allocated (often  
45 increasing it) for home visits and also changed the timing of visits to ensure they met with carers:  
46  
47  
48

49  
50 *Therapist 7: I mean I've done home visits at 8 o'clock in the evening, just to catch up with the*  
51 *carer, so I can have face-to-face and actually get what's going on, because I can't get hold of*  
52 *her during the day, she just doesn't answer her phone. So, having to do home visits in the*  
53 *evening, so that's impacting, that's where the hours are coming in, from doing more of that*  
54 *work...*  
55  
56 *Therapist 6: I've often gone out on home visits, and they've [the carer has] gone out. Then you*  
57 *have to extend your visit by an extra 20, 30 minutes because, you don't want to just leave... So*  
58 *you have to extend your visit sometimes, or you have to ring [the carer] afterwards.*  
59  
60 (Therapist focus group)

1  
2  
3  
4  
5  
6  
7  
8  
9  
10  
11  
12  
13  
14  
15  
16  
17  
18  
19  
20  
21  
22  
23  
24  
25  
26  
27  
28  
29  
30  
31  
32  
33  
34  
35  
36  
37  
38  
39  
40  
41  
42  
43  
44  
45  
46  
47  
48  
49  
50  
51  
52  
53  
54  
55  
56  
57  
58  
59  
60

Therapists sometimes also had to take additional time to identify and meet additional carers who were most likely to be the person supporting the intervention but not the carer who was originally nominated to take part in the intervention:

*Therapist 4: Actually the workload increases for us, because what we're doing is we're talking to the carer that's on the spot, and we're also having to liaise with the son and daughter, either by text or email, or something else in the evenings, that has quite a massive implication [agreement from others].*

(Therapist focus group)

Therapists also delivered several 'add-on' components in response to the needs of participants. First, the intervention component to address carers' levels of well-being was formally limited in the handbook to referring carers to local sources of support: *You can direct carers to appropriate sources of support in the local area, and encourage them to access these (27: pg. 51)*. However, one therapist reported contacting services directly:

*Therapist 7: I'm also contacting social services, so that the carer will get a break, that shouldn't be part of my role, but no-one else seems to.*

(Therapist focus group)

Second, therapists commented on (often marital) conflict in the relationships between participants and their carers, also noted in therapy logs, and attempted to reduce conflict even though they were aware it was beyond the parameters of the intervention:

*Therapist 2: I do find that it's about the nature of the relationship as well. And often you do find, like you're doing a couples intervention, it's not just about the dementia, it's often about the dynamics that have probably gone on through their whole relationship but the situation is highlighting it, and that's really quite difficult to manage, isn't it?*

*Therapist 6: Sometimes it's like marriage counselling*

*Therapist 2: Yeah... it's about their relationship, isn't it, it is a bit of the couples stuff, and I find myself doing that, and I think it is helpful, but it's beyond what we've been given.*

(Therapist focus group)

Several carers described in interviews how the therapist acted as a mediator in conflicts between the carer and person with dementia. Carers also reported improved relationships between themselves and participants as a result of the intervention, for example having increased understanding of and patience with the person with dementia. Several participants commented that they had greater social awareness and were more likely to consider the impact of what they said on others.

In these ways, self-organisation occurred through therapists' micro-level decisions to adjust (often increase) the time taken to engage carers, directly contact services, and reduce conflict between carers and people with dementia. Some therapists extended the intervention so that it was larger in scope than described in the handbook. These patterns of self-organisation can also be understood in



1  
2  
3 term of feedback loops, where therapists' adaptive behaviours were in response to the contexts and  
4 unmet needs of people with dementia and their carers.  
5  
6

### 7 ***Self-organisation in relational work and emergent 'social support' outcomes***

8  
9 Therapists engaged in building relationships with participants and their carers; the intervention  
10 handbook described one of the therapist's roles as '*Developing rapport with participants and carers*  
11 *and building good relationships'* (27: pg. 42). In interviews, people with dementia described positive  
12 relationships with therapists:  
13  
14

15  
16 *Oh fine, yeah fine, got on well ... Easy, yeah she explained everything and, you know, it was no*  
17 *hardship (laughs)...That's right, yeah, well sometimes when people come to see you, ... you're*  
18 *afraid to talk, you know, afraid to say anything when it's a little bit dumb. But she made me*  
19 *feel so comfortable and within a couple of minutes we were just like as though we'd been*  
20 *friends for a long time.*  
21

22 (Interview, Person with dementia 1)  
23  
24

25 Therapists reported that relationships with participants were an important aspect of the  
26 intervention, helping to engage people with dementia in the intervention and motivate them:  
27  
28

29 *Therapist 2: The actual nature of the relationship and that therapeutic rapport, which I think*  
30 *actually counts for a lot, but I think it largely goes unmeasured in a way, what we bring as*  
31 *people, and our relationship, and that's the motivating factor, and it's hard to know how you*  
32 *would measure that, but I think there is a lot about them getting to know you and you*  
33 *becoming part of their routine, and that goes a long way*  
34

35 *Therapist 5: I think they open up don't they*  
36

37 (Therapist focus group)  
38  
39

40 A good relationship was also important for therapists' work in that getting to know participants well  
41 underpinned their ability to help participants identify relevant goals and develop personalised  
42 strategies.  
43

44 Additionally, therapists recognised that their relational work and the provision of social support as  
45 being important in itself and would dedicate time specifically to this aspect of their visits:  
46  
47

48 *Therapist 6: I think sometimes it's that really good for the carer and the participant to have*  
49 *somebody going in and for such a long time. You do work on the goals, but another big part of*  
50 *it is quite, you know, supportive, and you know, social, because you spend the first ten minutes*  
51 *of your visit, they just go on about what they've done in the past week, and you can't be like,*  
52 *come on let's crack on [laughter] I think you do see in a lot of people, especially as you go on,*  
53 *they thaw a bit as you visit and then [several people agreeing] I get that good bond by session*  
54 *ten, and you're sad to pull out, but I think that support does really help.*  
55

56 (Therapist focus group)  
57  
58  
59  
60

1  
2  
3 This relational work was self-organising in that therapists conducted relational work and provided  
4 social support, going slightly beyond the intervention parameters by regarding it as an intervention  
5 component in itself and spending more time on this than reflected in the handbook.  
6  
7

8 The social support provided by the therapists also developed into an emergent outcome of the  
9 intervention in that it was perceived as the main benefit for some participants:  
10

11  
12 *Therapist 7: the pleasure of seeing people try and do well, even if they're not achieving their*  
13 *goals, it's the other things that they're getting from it, the social interaction, the time to talk*  
14 *about their condition, the dementia, and it not being hushed away and in the cupboard.*

15  
16 (Therapist focus group)  
17

18 In interviews, some people with dementia were unable to recall the goals they had been working  
19 towards but many commented on the relationship with the therapist and that they would miss the  
20 visits now the therapy had ended. Carers also commented on relational benefits for people with  
21 dementia:  
22  
23

24  
25 *I think my mum just enjoyed it more that somebody was, the social aspects of it, that*  
26 *somebody was coming*

27  
28 (Interview, Carer 1)  
29

30 The therapy log analysis indicated that relational and social support outcomes were an important (or  
31 at least the best-recalled) element of the intervention by people with greater cognitive impairment.  
32 At the end of the intervention, participants from the 'poor outcomes' group were more likely to  
33 refer to the relational or social aspect of the therapist visiting them as a positive element of the  
34 intervention, whereas participants in the 'best outcomes' group were more likely to give examples of  
35 formal components of the intervention that had benefitted them. One therapist also commented in  
36 the focus group that social support could be the primary benefit for the carer.  
37  
38

39 In these ways, relational work conducted by therapists and their provision of social support  
40 extended the scope of intervention as it was described in the handbook. Self-organisation occurred  
41 through micro-level decisions of therapists which helped them deliver the intervention successfully  
42 but also meet the social support needs of participants and in doing so developed into an emergent  
43 outcome.  
44  
45  
46  
47

## 48 Discussion

49

50 This article provides an example of how process evaluation findings can be interpreted using  
51 complexity theory and the concept of self-organisation. Some implementation processes occurred as  
52 self-organisation, through individual decisions made by therapists. These decisions produced 'order'  
53 at a higher level by creating patterns of service delivery and outcomes. The self-organisation of the  
54 intervention occurred partly by design, through a person-centred approach, but also through  
55 adaptations (to severity of dementia), extensions (of therapists' time and social support) and add-on  
56 components (carer support and relationship conflict resolution) (34). The handbook recommended  
57 but did not include detail about the adaptation of the intervention, and also implied flexibility in  
58  
59  
60

1  
2  
3 relation to the delivery of formal components rather than extending the time allocation or scope of  
4 the intervention (27). It was not always clear, therefore, where self-organisation fell within or  
5 outside of the intervention parameters. Some of the adaptations resulted from therapists'  
6 interpretation of the flexibility allowed within the intervention as an aspect of its personalised  
7 approach, to achieve participants' goals which was the core component of the intervention.  
8 Therapists are likely to have drawn on their professional training and experience to make decisions  
9 about when and how to adapt the intervention. For example, skilled therapists such as OTs would  
10 generally translate complex material for use with clients, such as simplifying language in a handbook.  
11 Therapists also felt they were going beyond the intervention design at times, particularly in feedback  
12 loops when they provided 'add-ons' in response to participants' needs and contexts such as  
13 addressing relationship conflicts. Implementation within a trial context meant the intervention was  
14 described in a structured way in the handbook and there was less flexibility than would be the case  
15 in normal clinical practice. This may have led therapists to view the intervention as relatively  
16 structured and been more likely to view their adaptations as falling outside the intervention  
17 parameters.  
18  
19  
20  
21  
22  
23

24  
25 The findings about self-organisation have several implications for further studies or wider roll-out of  
26 the GREAT intervention. First, the adaptations made by therapists for people with greater cognitive  
27 impairment (within the trial range of a Mini Mental State Examination score of  $\geq 18$  points) could be  
28 added to the handbook as examples of tailoring to the specific needs of the person, and inform  
29 training for therapists. Second, referrals to other services and specialised professionals could be  
30 enhanced in order to meet the wider needs of people with dementia and their carers, particularly  
31 for common issues such as relationship conflict. Third, social support needs could be addressed by  
32 referral to an alternative, less resource-intensive intervention such as befriending. Alternatively, the  
33 emergent outcome of social support, particularly for those with greater cognitive impairment, could  
34 be more formally incorporated into the intervention design. This may require increased resourcing,  
35 including formally incorporating this skill into recruitment and training for professionals, depending  
36 on what prior training practitioners have received (35). This intervention was delivered mainly by  
37 skilled OT therapists who typically offer a range of types of support; if the intervention was delivered  
38 by OT assistants, for example, additional training might be required. This also depends on whether  
39 future interventions are defined as targeted CR interventions or expanded to incorporate the  
40 additional elements observed in this study. Fourth, the time allocation for visits could be revised, or  
41 made more flexible, to accommodate the additional time requirements for some visits due to the  
42 extended or 'add-on' components provided. Lastly, future evaluations of the intervention could  
43 investigate the impact of social support for participants and carers, since findings indicated this area  
44 was important but an in-depth examination of this was beyond the scope of the study.  
45  
46  
47  
48  
49  
50

51 This analysis had several limitations. First, the qualitative data are the views and perceptions of the  
52 therapists, participants and carers of how the intervention operated, and the therapy logs were  
53 relatively brief notes made by therapists. Second, only one focus group of six therapists was  
54 conducted, and the therapy log analysis was limited to 50 participants. However, this analysis was  
55 designed to produce theoretical generalisability through in-depth analysis rather than a large sample  
56 size.  
57  
58  
59  
60

1  
2  
3 Applying a complexity theory lens had advantages over traditional process evaluation approaches. It  
4 explained how decisions dispersed throughout a system at the micro-level interacted with  
5 population characteristics and context, and how this influenced what intervention was delivered and  
6 what outcomes it produced. It went beyond describing practitioner adaptations, as it showed how  
7 adaptation can create 'order' in general patterns of behaviour and in creating outcomes other than  
8 that which was originally intended by the intervention (in this case, social support). The idea of self-  
9 organisation also specifically conceptualises decisions made by practitioners as a 'bottom up'  
10 phenomenon which emphasises the less predictable nature of this kind of behaviour. This is in  
11 contrast to the fidelity and adaptation literature which emphasises defining core form and function,  
12 and peripheral aspects of interventions, to identify what should be planned or controlled (22, 36,  
13 37). The type of self-organising feedback loops described here is likely to be a common pattern in  
14 health interventions, where practitioners adapt interventions to meet the needs of their clients. It  
15 may be particularly common where participants have high levels of unmet needs, co-morbidities or  
16 in complex cases. Future studies of implementation could analyse the micro-processes of self-  
17 organisation specifically, in addition to formal components of interventions. This type of approach  
18 requires an agnostic position on fidelity of intervention delivery since lack of adherence to  
19 intervention protocols is not necessarily a negative aspect of the intervention (38). Although some  
20 degree of fidelity is important for studies such as trials, understanding how adaptation may occur is  
21 important for real-world implementation. Adaptive behaviours could be positive in that they support  
22 individuals, help engage participants, and help tailor the intervention to a local context (14, 39, 40).  
23 However, adaptive behaviours could also create difficulties if they expand the scope of the  
24 intervention beyond what is possible for sustained delivery, or are unsuccessful. Expansion could  
25 displace the delivery of core components of the intervention, for example, or lead to burnout in  
26 practitioners. This depends partly on how the intervention is being developed and refined during  
27 process evaluations: in some early-stage studies, adaptations by practitioners in practice may be  
28 helpful. However, when testing a well-defined intervention in a definitive trial, adaptations could be  
29 more problematic. Clarity about the balance required between fidelity and adaptation, and the  
30 trade-offs involved, is therefore necessary (41).  
31  
32  
33  
34  
35  
36  
37  
38  
39  
40

41 A complexity perspective was also useful in that it identified informal, less visible processes which  
42 might not be picked up by standard evaluation models measuring fidelity against formal components  
43 and protocols. One particularly informal and non-visible aspect of the intervention was the relational  
44 work conducted by therapists and the provision of social support through this. Findings from this  
45 study were that it was an important aspect of how the intervention operated: it facilitated  
46 participant and carer engagement in the intervention, supported aspects such as personalisation,  
47 and underpinned improved social support valued by participants and their carers. While relational  
48 and social support work may be recognised by practitioners as a common micro-level process, it is  
49 given comparatively little attention in published health intervention research (42, 43). This study  
50 suggests it is worthy of more attention in health intervention evaluation studies.  
51  
52  
53  
54

55 Complexity theory was used here to retrospectively explain the implementation of an intervention,  
56 which is less useful than predictive theory. However, the latter is challenging (10, 44). Rather than  
57 being predictive in a strong sense, complexity theory could inform programme theories and logic  
58 models to include commonly-occurring patterns such as self-organisation or feedback loops (45).  
59  
60

1  
2  
3 Complexity constructs could be used deductively in qualitative data analysis, for example. In this  
4 study, they were particularly useful in the later stages of analysis when findings were considered  
5 together to try to understand how the different elements of the intervention worked together. This  
6 could be supported through developing less linear logic models and applying them flexibly as  
7 programme theory develops during an evaluation (3, 19). Emergent outcomes could be considered  
8 as one potential outcome in a logic model, in addition to pre-specified primary and secondary  
9 outcomes. Adaptation and feedback loops could also be incorporated in logic models, as suggested  
10 in the MRC process evaluation guidance (1). To this end, complexity theory could be more useful for  
11 process evaluation as a methodological theory to guide modelling, data collection and analysis, or an  
12 overarching framework, rather than a type of theory that explains how the world works in a strongly  
13 predictive sense (9, 46). An alternative approach is to combine complexity approaches with other  
14 theoretical perspectives which explain agency or structures at different levels of a system (6, 8, 47).  
15 Both approaches require multiple, exploratory and flexible methods, including qualitative methods  
16 of sufficient depth, in order to identify informal, complex and unpredictable patterns (6, 7, 12, 40,  
17 48). While complexity theory is increasingly employed, it is still a relatively new approach in complex  
18 health interventions research, particularly in empirical research (40, 49). Calls have been made for  
19 further examples of its application as well as better operationalisation of its concepts (1, 7, 49, 50).  
20 This article has provided one example of how complexity theory, particularly the concept of self-  
21 organisation, can be useful for providing insight into the implementation of an intervention that  
22 would have been missed by a process evaluation only focusing on formal intervention components.  
23  
24  
25  
26  
27  
28  
29  
30  
31

### 32 **Author contributions**

33 SMT designed and conducted the analysis of the focus group and therapy log data, oversaw the  
34 analysis and discussed themes from the interview data; and devised and drafted the paper; AK  
35 discussed themes developed from the focus group and therapy log data, and also commented on  
36 several drafts of the paper; KW analysed interview data and commented on several drafts of the  
37 paper; JO conducted the focus group, contributed to the study design and commented on several  
38 drafts of the paper; IL, JP, and RW contributed to the study design and commented on several  
39 drafts of the paper; LC oversaw the study design, discussed themes developed, and commented on several  
40 drafts of the paper; LC oversaw the study design, discussed themes developed, and commented on several  
41 drafts of the paper.  
42  
43

### 44 **Disclaimer**

45  
46 KW is now supported by the NIHR Applied Research Collaboration East of England. The views and  
47 opinions expressed therein are those of the authors and do not necessarily reflect those of the HTA  
48 programme, Applied Research Collaboration South West Peninsula, Applied Research Collaboration  
49 East of England, NIHR, NHS or the Department of Health and Social Care.  
50  
51

### 52 **Acknowledgements**

53  
54 We thank all the participants with dementia and their family supporters who generously contributed  
55 their time to be part of this study. We also thank our experts by experience and staff at Alzheimer's  
56 Society for supporting the study. We would like to acknowledge the key roles played by Ho Yin Chan,  
57 Matthew Lewis and Julie Nixon who conducted the qualitative interviews, Dr Gill Toms who  
58  
59  
60

1  
2  
3 conducted some of the qualitative data analysis, and the trial therapists who provided the  
4 intervention.  
5

### 6 **Patient and Public Involvement**

7  
8 For the GREAT trial, in which the process evaluation was embedded, experts by experience including  
9 Alzheimer's Society Research Volunteers were consulted at the set-up stage to inform participant  
10 information resources and trial procedures. As a result we made a number of amendments to the  
11 participant-facing documents and assessment measures. The inclusion of qualitative interviews and  
12 a focus group in the study design was at the suggestion of the experts by experience. They also  
13 provided insightful comments about the progress of the trial and contributed to developing a follow-  
14 up application for an implementation grant. Study participants were updated about trial progress  
15 through a regular newsletter.  
16  
17  
18  
19

### 20 **Trial registration**

21 ISRCTN21027481  
22  
23

### 24 **Ethics approval statement**

25  
26 The study was reviewed by Wales Rec 5, which issued a favourable opinion on 25th June 2012  
27 (Reference 12/WA/0185), and was approved by the Bangor University School of Psychology  
28 Research Ethics Committee.  
29

### 30 **Reporting statement**

31  
32 Methods and findings are reported in accordance with the Standards for Reporting Qualitative  
33 Research (SRQR) checklist (see appendix 1).  
34  
35

### 36 **Competing interests statement**

37  
38 The authors declare they have no competing interests.  
39

### 40 **Funding statement**

41  
42 This work was supported by NIHR HTA, grant number 11/15/04.  
43

### 44 **Data sharing statement**

45  
46 Interview and focus group data were not deposited in an archive due to the small numbers of  
47 individuals participating in named sites, which could compromise anonymity through potentially  
48 identifiable information in transcripts. Therapy logs data were clinical notes and therefore not  
49 appropriate for depositing in an archive.  
50

### 51 **References**

- 52  
53  
54 1. Moore G, Audrey S, Barker M, et al. Process Evaluation of Complex Interventions: Medical  
55 Research Council Guidance. London: MRC Population Health Science Research Network; 2014.  
56 2. Eccles MP, Mittman BS. Welcome to Implementation Science. Implementation Science.  
57 2006;1(1):1.  
58 3. Rogers PJ. Using programme theory to evaluate complicated and complex aspects of  
59 interventions. Evaluation. 2008;14(1):29-48.  
60

- 1
- 2
- 3
4. Clare L, Kudlicka A, Oyebode JR, et al. Goal-oriented cognitive rehabilitation for early-stage Alzheimer's and related dementias: the GREAT RCT. *Health Technol Assess*. 2019;23(10).
5. Clare L, Kudlicka A, Bayer A, et al. Goal-oriented cognitive rehabilitation in early-stage Alzheimer's and related dementias: results from a multi-centre, single-blind, randomised controlled trial (The GREAT trial). *Alzheimer's & Dementia: The Journal of the Alzheimer's Association*. 2017;13(7):P899-P900.
6. Walton M. Applying complexity theory: a review to inform evaluation design. *Eval Program Plann*. 2014;45:119-26.
7. Greenhalgh T, Papoutsi C. Studying complexity in health services research: desperately seeking an overdue paradigm shift. *BMC Med*. 2018;16(1):95.
8. Callaghan G. Evaluation and negotiated order: developing the application of complexity theory. *Evaluation*. 2008;14(4):399-411.
9. Kernick D. Wanted—new methodologies for health service research. Is complexity theory the answer? *Fam Pract*. 2006;23(3):385-90.
10. Thompson DS, Fazio X, Kustra E, et al. Scoping review of complexity theory in health services research. *BMC Health Services Research*. 2016;16(1):87.
11. Paley J, Eva G. Complexity theory as an approach to explanation in healthcare: A critical discussion. *International Journal of Nursing Studies*. 2011;48(2):269-79.
12. Churruca K, Pomare C, Ellis LA, et al. The influence of complexity: a bibliometric analysis of complexity science in healthcare. *BMJ Open*. 2019;9(3):e027308.
13. Clark AM. What are the components of complex interventions in healthcare? Theorizing approaches to parts, powers and the whole intervention. *Social Science & Medicine*. 2013;93:185-93.
14. Braithwaite J, Churruca K, Long JC, et al. When complexity science meets implementation science: a theoretical and empirical analysis of systems change. *BMC Med*. 2018;16(1):63.
15. Caffrey L, Wolfe C, McKeivitt C. Embedding research in health systems: lessons from complexity theory. *Health Res Policy Syst*. 2016;14(1):54.
16. Colón-Emeric CS, Lekan-Rutledge D, Utley-Smith Q, et al. Connection, regulation, and care plan innovation: a case study of four nursing homes. *Health Care Manage Rev*. 2006;31(4):337-46.
17. Chandler J, Rycroft-Malone J, Hawkes C, et al. Application of simplified Complexity Theory concepts for healthcare social systems to explain the implementation of evidence into practice. *J Adv Nurs*. 2016;72(2):461-80.
18. Trimmer JD. *Response of Physical Systems*. New York: Wiley & Sons; 1950.
19. Hawe P. Lessons from complex interventions to improve health. *Annual Review of Public Health*. 2015;36(1):307-23.
20. May CR, Johnson M, Finch T. Implementation, context and complexity. *Implementation Science*. 2016;11(1):141.
21. Hawe P, Shiell A, Riley T. Complex interventions: How “out of control” can a randomised controlled trial be? *British Medical Journal*. 2004;328:1561-3.
22. Kirk MA, Haines ER, Rokoske FS, et al. A case study of a theory-based method for identifying and reporting core functions and forms of evidence-based interventions. *Transl Behav Med*. 2019;11(1):21-33.
23. Byrne D. What Is complexity science? Thinking as a realist about measurement and cities and arguing for natural history. *Emergence*. 2001;3(1):61-76.
24. Eppel EA, Rhodes ML. Complexity theory and public management: a ‘becoming’ field. *Public Management Review*. 2018;20(7):949-59.
25. Clare L, Bayer A, Burns A, et al. Goal-oriented cognitive rehabilitation in early-stage dementia: study protocol for a multi-centre single-blind randomised controlled trial (GREAT). *Trials*. 2013;14(1):152.
26. Kudlicka A, Clare L. Cognitive rehabilitation in mild and moderate dementia. 2018. In: Oxford Research Encyclopedia of Psychology [Internet].

- 1
  - 2
  - 3
  - 4
  - 5
  - 6
  - 7
  - 8
  - 9
  - 10
  - 11
  - 12
  - 13
  - 14
  - 15
  - 16
  - 17
  - 18
  - 19
  - 20
  - 21
  - 22
  - 23
  - 24
  - 25
  - 26
  - 27
  - 28
  - 29
  - 30
  - 31
  - 32
  - 33
  - 34
  - 35
  - 36
  - 37
  - 38
  - 39
  - 40
  - 41
  - 42
  - 43
  - 44
  - 45
  - 46
  - 47
  - 48
  - 49
  - 50
  - 51
  - 52
  - 53
  - 54
  - 55
  - 56
  - 57
  - 58
  - 59
  - 60
27. Clare L, Kudlicka A. Goal-Oriented Cognitive Rehabilitation in Early-Stage Alzheimer's and related Dementias: Multi-Centre Single-Blind Randomised Controlled Trial (GREAT): Handbook for Therapists. Bangor: University of Bangor; 2015.
28. Craig P, Dieppe P, Macintyre S, et al. Developing and Evaluating Complex Interventions: New Guidance. London: MRC; 2008.
29. Warmoth K, Morgan-Trimmer S, Kudlicka A, et al. Reflections on a personalized cognitive rehabilitation intervention: Experiences of people living with dementia and their carers participating in the GREAT trial. *Neuropsychological Rehabilitation*. 2020;1-19.
30. Braun V, Clarke V. Thematic analysis. In: Cooper H, editor. *APA Handbook of Research Methods in Psychology* 2012. p. 57-71.
31. Ritchie J, Spencer L, O'Connor W. Carrying out qualitative analysis. In: Ritchie J, Lewis J, editors. *Qualitative research practice: a guide for social science students and researchers*. London, UK: SAGE Publications; 2003. p. 219-62.
32. Braun V, Clarke V. Using thematic analysis in psychology. *Qual Res Psychol*. 2006;3(2):77-101.
33. Maxwell JA. *A Realist Approach for Qualitative Research*. London: Sage; 2012.
34. Mitchell G, Agnelli J. Person-centred care for people with dementia: Kitwood reconsidered. *Nursing Standard*. 2015;30(7):46-50.
35. Delgado C, Upton D, Ranse K, et al. Nurses' resilience and the emotional labour of nursing work: An integrative review of empirical literature. *International Journal of Nursing Studies*. 2017;70:71-88.
36. Miller CJ, Wiltsey-Stirman S, Baumann AA. Iterative Decision-making for Evaluation of Adaptations (IDEA): A decision tree for balancing adaptation, fidelity, and intervention impact. *J Community Psychol*. 2020;48(4):1163-77.
37. Movsisyan A, Arnold L, Copeland L, et al. Adapting evidence-informed population health interventions for new contexts: a scoping review of current practice. *Health Res Policy Syst*. 2021;19(1):13.
38. Kirk AM. Adaptation. In: Nilsen P, Birken SA, editors. *Handbook on Implementation Science*. Cheltenham: Edward Elgar; 2020. p. 317-32.
39. Khan S, Vander Morris A, Shepherd J, et al. Embracing uncertainty, managing complexity: applying complexity thinking principles to transformation efforts in healthcare systems. *BMC Health Services Research*. 2018;18(1):192.
40. Long KM, McDermott F, Meadows GN. Being pragmatic about healthcare complexity: our experiences applying complexity theory and pragmatism to health services research. *BMC Med*. 2018;16(1):94.
41. Toomey E, Hardeman W, Hankonen N, et al. Focusing on fidelity: narrative review and recommendations for improving intervention fidelity within trials of health behaviour change interventions. *Health Psychology and Behavioral Medicine*. 2020;8(1):132-51.
42. Solman B, Clouston T. Occupational therapy and the therapeutic use of self. *British Journal of Occupational Therapy*;79(8):514-6.
43. Rahkonen T, Eloniemi-Sulkava U, Paanila S, et al. Systematic Intervention for Supporting Community Care of Elderly People After a Delirium Episode. *Int Psychogeriatr*. 2001;13(1):37-49.
44. Glanz K, Bishop DB. The role of behavioral science theory in development and implementation of public health interventions. *Annual Review of Public Health*. 2010;31(1):399-418.
45. Ling T. Evaluating complex and unfolding interventions in real time. *Evaluation*. 2012;18(1):79-91.
46. Gear C, Eppel E, Koziol-McLain J. Advancing complexity theory as a qualitative research methodology. *International Journal of Qualitative Methods*. 2018;17(1).
47. Westhorp G. Using complexity-consistent theory for evaluating complex systems. *Evaluation*. 2012;18(4):405-20.



- 1  
2  
3 48. Grant RL, Hood R. Complex systems, explanation and policy: implications of the crisis of  
4 replication for public health research. *Critical Public Health*. 2017;27(5):525-32.  
5 49. Rusoja E, Haynie D, Sievers J, et al. Thinking about complexity in health: A systematic review  
6 of the key systems thinking and complexity ideas in health. *J Eval Clin Pract*. 2018;24(3):600-6.  
7 50. Brainard J, Hunter PR. Do complexity-informed health interventions work? A scoping review.  
8 *Implementation Science*. 2016;11(1):127.  
9  
10  
11  
12  
13  
14  
15  
16  
17  
18  
19  
20  
21  
22  
23  
24  
25  
26  
27  
28  
29  
30  
31  
32  
33  
34  
35  
36  
37  
38  
39  
40  
41  
42  
43  
44  
45  
46  
47  
48  
49  
50  
51  
52  
53  
54  
55  
56  
57  
58  
59  
60

For peer review only

**Appendix 1: Methods and findings reported in accordance with the Standards for Reporting Qualitative Research (SRQR)**

|                                                                                   |                                                                                                                                                                                                                                                                                                                                           |
|-----------------------------------------------------------------------------------|-------------------------------------------------------------------------------------------------------------------------------------------------------------------------------------------------------------------------------------------------------------------------------------------------------------------------------------------|
| S1 Title                                                                          | The title indicates the type of study and theoretical focus of the paper                                                                                                                                                                                                                                                                  |
| S2 Abstract                                                                       | An abstract with background, methodological detail and conclusions has been included                                                                                                                                                                                                                                                      |
| S3 Problem formulation                                                            | The introductory section comments on limitations of process evaluations and outlines how complexity theory could improve process evaluations                                                                                                                                                                                              |
| S4 Purpose or research question                                                   | The research question is stated in the first paragraph of the introduction.                                                                                                                                                                                                                                                               |
| Methods                                                                           |                                                                                                                                                                                                                                                                                                                                           |
| S5 Qualitative approach and research paradigm                                     | The methods section states that the paper presents findings from a process evaluation embedded in a trial. The methods section describes the qualitative research as underpinned by a critical realist paradigm, and that qualitative interview and focus group data were analysed using a combined deductive and inductive approach.     |
| S6 Researcher characteristics and reflexivity                                     | The methods section states that the researchers analysing the data had no previous involvement in the study                                                                                                                                                                                                                               |
| S7 Context Setting/site and salient contextual factors                            | The introduction and background section provides information about the intervention setting, and includes references to more detailed publications about the study setting.                                                                                                                                                               |
| S8 Sampling strategy How and why research participants, documents, or events were | The methods section describes how participants were sampled. All available therapists were invited to a focus group, people with dementia were consecutively sampled across different sites, and therapy logs were sampled for around 10% of people receiving the intervention who had the best and worst outcomes from the intervention. |

|                                                                                                  |                                                                                                                                                                                                                                                                                                                                         |
|--------------------------------------------------------------------------------------------------|-----------------------------------------------------------------------------------------------------------------------------------------------------------------------------------------------------------------------------------------------------------------------------------------------------------------------------------------|
| S9 Ethical issues                                                                                | Details and reference number of the ethics approval are included                                                                                                                                                                                                                                                                        |
| S10 Data collection methods                                                                      | The timing and methods for data collection are described in detail in the methods section                                                                                                                                                                                                                                               |
| S11 Data collection instruments                                                                  | Data collection instruments are included in the appendices                                                                                                                                                                                                                                                                              |
| S12 Units of study                                                                               | Numbers and descriptions of participants are included                                                                                                                                                                                                                                                                                   |
| S13 Data processing                                                                              | Transcription and use of NVivo are noted in the methods section. All data were stored on secure university servers.                                                                                                                                                                                                                     |
| S14 Data analysis                                                                                | The method and stages of data analysis are described. The analysis of therapy logs drew on findings from the focus group – this is included in the description of methods.                                                                                                                                                              |
| S15 Techniques to enhance trustworthiness                                                        | The methods section states that focus group and interview data were collected by researchers without close involvement in the intervention. Data were analysed by researchers who had not been involved in the study up to that point (SMT and KW); developing themes from all datasets were discussed in meetings by the research team |
| Results/findings                                                                                 |                                                                                                                                                                                                                                                                                                                                         |
| S16 Synthesis and interpretation                                                                 | Findings are presented in relation to the theoretical concepts described in the introductory section.                                                                                                                                                                                                                                   |
| S17 Links to empirical data                                                                      | Quotes are included to substantiate the themes presented in the findings section                                                                                                                                                                                                                                                        |
| Discussion                                                                                       |                                                                                                                                                                                                                                                                                                                                         |
| S18 Integration with prior work, implications, transferability, and contribution(s) to the field | Findings are summarised in the discussion section. Findings are also related to future implementation of the intervention and implications for the theoretical perspective (complexity theory)                                                                                                                                          |

|                                                             |                                                                  |
|-------------------------------------------------------------|------------------------------------------------------------------|
| S19 Limitations Trustworthiness and limitations of findings | Limitations of the study are included in the discussion section. |
| S20 Conflicts of interest                                   | The authors have declared there are no conflicts of interest.    |
| S21 Funding                                                 | The funder and grant number is stated.                           |

For peer review only

## **Appendix 2: GREAT focus group schedule - therapists' experience of providing goal-oriented cognitive rehabilitation for people with dementia (PwD) in GREAT**

### **Introduction - aims of the focus group**

The aim of this focus group is to explore therapists' experience of working with PwD to provide goal-oriented CR, to capture the nature of the interactions and the way in which the therapists deploy their skills to achieve the desired outcomes. We will use the results to inform the process of educating others on how to implement goal-oriented CR and to consider ways to further enhance CR in future.

- We value your open and honest responses. Please feel free to share your point of view even if it differs from what others have said. Every person's experiences and opinions are important.
- We are tape recording to capture everything you have to say, but we won't identify anyone by name in the report. The recording will be transcribed by someone from outside the team and anonymised.

### **General views on the process of providing goal-oriented cognitive rehabilitation – 10 min**

How do you find the process of providing goal-oriented CR in GREAT?

What is it like to provide goal-oriented CR in GREAT?

### **Things that have worked well in providing goal-oriented CR – 10 min**

What are the things that work well for you in the therapy process?

Which aspects do you look forward to most?

### **Challenges or difficulties in providing goal-oriented CR –10 min**

What aspects of your work on providing goal-oriented CR in GREAT are most challenging?

What are the difficulties that you encounter when providing goal-oriented CR in GREAT?

### **Additional questions on the process of providing goal-oriented cognitive rehabilitation – 15 min**

What sort of things have you learnt so far about working on cog rehab goals from working on the trial?

How do you find the role of the carer during the therapy process?

Has anything surprised you about the process?

Do you have hunches about what sort of people seem to benefit most?

If you were in charge, is there anything you'd be tempted to change about the way we have set up the study regarding working on the goals?

What do you think about the length of sessions?

What do you think about the overall length of the therapy?

How do you find training and supervision provided in GREAT?

If you were providing top tips to a therapist, what would be the key things you'd advise them to look out for or do?

### **Closing question**

Before we finish the focus group, is there anything that we have missed? Is there anything anyone would like to say about their experience of providing goal-oriented CR in GREAT?

1  
2  
3  
4  
5  
6  
7  
8  
9  
10  
11  
12  
13  
14  
15  
16  
17  
18  
19  
20  
21  
22  
23  
24  
25  
26  
27  
28  
29  
30  
31  
32  
33  
34  
35  
36  
37  
38  
39  
40  
41  
42  
43  
44  
45  
46  
47  
48  
49  
50  
51  
52  
53  
54  
55  
56  
57  
58  
59  
60

**Summing up and moving on**

*Summarise main points of the discussion, balance negative comments with positive comments.  
Thank everyone for sharing their comments on providing goal-oriented CR in GREAT and end the focus group.*

For peer review only

### Appendix 3: Topics recorded by therapists in therapy logs

| <u>Therapy log topic</u>    | <u>Therapist ratings or comments recorded under relevant sessions</u>                                                                                                                                                                                                                                                                                                                                                                                                                                                                                                                                             |
|-----------------------------|-------------------------------------------------------------------------------------------------------------------------------------------------------------------------------------------------------------------------------------------------------------------------------------------------------------------------------------------------------------------------------------------------------------------------------------------------------------------------------------------------------------------------------------------------------------------------------------------------------------------|
| Compliance                  | Whether given session was completed                                                                                                                                                                                                                                                                                                                                                                                                                                                                                                                                                                               |
| Relationships               | The relationship the therapist developed with the participant and carer, and the relationship between the participant and carer                                                                                                                                                                                                                                                                                                                                                                                                                                                                                   |
| Goals                       | Participant and carer responsiveness to the solution-focused problem-solving approach<br>Goal 1: agreed strategies, between-session practice, and progress<br>Goal 2: agreed strategies, between-session practice, and progress<br>Goal 3: agreed strategies, between-session practice, and progress<br>Any adjustments or modifications to goal statements provided at baseline<br>In-session goal attainment ratings by participant, carer and therapist (sessions 10 and 14) and comments on these<br>Selection of goal attainment scaling indicators for each goal (sessions 10 and 14) and comments on these |
| Activity levels             | Review of activity levels, plan for behavioural activation to increase activity engagement, and comments on progress                                                                                                                                                                                                                                                                                                                                                                                                                                                                                              |
| Compensatory strategy use   | Review of current use of compensatory strategies and environmental adaptations, plan to develop strategy use, and comments on progress                                                                                                                                                                                                                                                                                                                                                                                                                                                                            |
| Restorative strategy use    | Response to information about restorative strategies, plan for developing restorative strategy use, and comments on progress                                                                                                                                                                                                                                                                                                                                                                                                                                                                                      |
| Attention and concentration | Strategies introduced to help maintain attention and concentration, and progress with applying these strategies                                                                                                                                                                                                                                                                                                                                                                                                                                                                                                   |

|    |                   |                                                                                 |
|----|-------------------|---------------------------------------------------------------------------------|
| 1  |                   |                                                                                 |
| 2  |                   |                                                                                 |
| 3  |                   |                                                                                 |
| 4  |                   |                                                                                 |
| 5  | Anxiety           | Current use of anxiety management strategies, carer's perspective on the        |
| 6  | management        | participant's use of these strategies, introduction or refinement of anxiety    |
| 7  |                   | management technique(s), and progress with use of anxiety management            |
| 8  |                   | strategies                                                                      |
| 9  |                   |                                                                                 |
| 10 |                   |                                                                                 |
| 11 |                   |                                                                                 |
| 12 |                   |                                                                                 |
| 13 | Carer well-being  | Review with carer, and plan for enhancing carer well-being                      |
| 14 |                   |                                                                                 |
| 15 |                   |                                                                                 |
| 16 |                   |                                                                                 |
| 17 | Carer involvement | The extent to which the carer was engaged in supporting the process of          |
| 18 |                   | therapy                                                                         |
| 19 |                   |                                                                                 |
| 20 |                   |                                                                                 |
| 21 |                   |                                                                                 |
| 22 |                   |                                                                                 |
| 23 | Ending therapy    | Plans for maintaining progress after the end of the intervention, and review of |
| 24 |                   | other sources of help and support                                               |
| 25 |                   |                                                                                 |
| 26 |                   |                                                                                 |
| 27 |                   |                                                                                 |
| 28 |                   |                                                                                 |
| 29 | Experience of     | Review with the participant and with the carer, and therapist reflection on the |
| 30 | therapy           | process of therapy; therapist confidence in addressing participants' goals      |
| 31 |                   | (following the nine month follow-up)                                            |
| 32 |                   |                                                                                 |
| 33 |                   |                                                                                 |
| 34 |                   |                                                                                 |
| 35 |                   |                                                                                 |
| 36 |                   |                                                                                 |
| 37 |                   |                                                                                 |
| 38 |                   |                                                                                 |
| 39 |                   |                                                                                 |
| 40 |                   |                                                                                 |
| 41 |                   |                                                                                 |
| 42 |                   |                                                                                 |
| 43 |                   |                                                                                 |
| 44 |                   |                                                                                 |
| 45 |                   |                                                                                 |
| 46 |                   |                                                                                 |
| 47 |                   |                                                                                 |
| 48 |                   |                                                                                 |
| 49 |                   |                                                                                 |
| 50 |                   |                                                                                 |
| 51 |                   |                                                                                 |
| 52 |                   |                                                                                 |
| 53 |                   |                                                                                 |
| 54 |                   |                                                                                 |
| 55 |                   |                                                                                 |
| 56 |                   |                                                                                 |
| 57 |                   |                                                                                 |
| 58 |                   |                                                                                 |
| 59 |                   |                                                                                 |
| 60 |                   |                                                                                 |



#### Appendix 4: Interview schedule for the person with dementia

The interview will take form of a conversation and the interviewer will encourage the participant to talk freely about the experience of the cognitive rehabilitation intervention.

The researcher will begin by re-establishing consent for the interview and for audio-recording.

The researcher may begin with some general conversation to build rapport as appropriate.

The researcher will introduce the main part of the interview by saying:

*You've been taking part in the GREAT study and having visits from the therapist, and I'd like to know your views on what it was like. I'm interested in what it was like to take part in the study and how you found the visits from the therapist.*

##### 1. Experiences

The researcher will explore the participant's experiences and feelings starting with general questions:

*How did you find the therapist's visits over the past few weeks?*

*What was it like to work with the therapist on your goals?*

More specific information will then be elicited using prompts such as the following:

*What were the more enjoyable things about your work with the therapist?*

*What were the less enjoyable things about your work with the therapist?*

*What aspects of your work with the therapist were more/less helpful?*

*Did you find it hard work to take part in the therapy?*

*What aspects of your work with the therapist were most challenging?*

The interviewer will encourage the person to give specific examples, where possible.

##### 2. Outcomes

The researcher will explore the impact of taking part in cognitive rehabilitation on the person's everyday life and self-perceptions.

*What difference (if any) has your work with the therapist made to your daily life?*

*Has the experience changed anything in the way you think about your dementia/about yourself/about the future?*

*Has the experience changed anything in the way you relate to your carer/family?*

The researcher will draw on positive comments from the participant to end the conversation on a positive note.
