# Supplementary material for: Implementation processes in a cognitive rehabilitation intervention for people with dementia: a complexity-informed qualitative analysis
Source: PubMed Central journal article supplement (PMC8549661; doi:10.1136/bmjopen-2021-051255), 2021-10-26
Supplement: bmjopen-2021-051255supp001.pdf [file bmjopen-2021-051255supp001.pdf]

**Appendix 1: Methods and findings reported in accordance with the Standards for Reporting Qualitative Research (SRQR)**

|                                                                                   |                                                                                                                                                                                                                                                                                                                                           |
|-----------------------------------------------------------------------------------|-------------------------------------------------------------------------------------------------------------------------------------------------------------------------------------------------------------------------------------------------------------------------------------------------------------------------------------------|
| S1 Title                                                                          | The title indicates the type of study and theoretical focus of the paper                                                                                                                                                                                                                                                                  |
| S2 Abstract                                                                       | An abstract with background, methodological detail and conclusions has been included                                                                                                                                                                                                                                                      |
| S3 Problem formulation                                                            | The introductory section comments on limitations of process evaluations and outlines how complexity theory could improve process evaluations                                                                                                                                                                                              |
| S4 Purpose or research question                                                   | The research question is stated in the first paragraph of the introduction.                                                                                                                                                                                                                                                               |
| Methods                                                                           |                                                                                                                                                                                                                                                                                                                                           |
| S5 Qualitative approach and research paradigm                                     | The methods section states that the paper presents findings from a process evaluation embedded in a trial. The methods section describes the qualitative research as underpinned by a critical realist paradigm, and that qualitative interview and focus group data were analysed using a combined deductive and inductive approach.     |
| S6 Researcher characteristics and reflexivity                                     | The methods section states that the researchers analysing the data had no previous involvement in the study                                                                                                                                                                                                                               |
| S7 Context Setting/site and salient contextual factors                            | The introduction and background section provides information about the intervention setting, and includes references to more detailed publications about the study setting.                                                                                                                                                               |
| S8 Sampling strategy How and why research participants, documents, or events were | The methods section describes how participants were sampled. All available therapists were invited to a focus group, people with dementia were consecutively sampled across different sites, and therapy logs were sampled for around 10% of people receiving the intervention who had the best and worst outcomes from the intervention. |

|                                                                                                  |                                                                                                                                                                                                                                                                                                                                         |
|--------------------------------------------------------------------------------------------------|-----------------------------------------------------------------------------------------------------------------------------------------------------------------------------------------------------------------------------------------------------------------------------------------------------------------------------------------|
| S9 Ethical issues                                                                                | Details and reference number of the ethics approval are included                                                                                                                                                                                                                                                                        |
| S10 Data collection methods                                                                      | The timing and methods for data collection are described in detail in the methods section                                                                                                                                                                                                                                               |
| S11 Data collection instruments                                                                  | Data collection instruments are included in the appendices                                                                                                                                                                                                                                                                              |
| S12 Units of study                                                                               | Numbers and descriptions of participants are included                                                                                                                                                                                                                                                                                   |
| S13 Data processing                                                                              | Transcription and use of NVivo are noted in the methods section. All data were stored on secure university servers.                                                                                                                                                                                                                     |
| S14 Data analysis                                                                                | The method and stages of data analysis are described. The analysis of therapy logs drew on findings from the focus group – this is included in the description of methods.                                                                                                                                                              |
| S15 Techniques to enhance trustworthiness                                                        | The methods section states that focus group and interview data were collected by researchers without close involvement in the intervention. Data were analysed by researchers who had not been involved in the study up to that point (SMT and KW); developing themes from all datasets were discussed in meetings by the research team |
| Results/findings                                                                                 |                                                                                                                                                                                                                                                                                                                                         |
| S16 Synthesis and interpretation                                                                 | Findings are presented in relation to the theoretical concepts described in the introductory section.                                                                                                                                                                                                                                   |
| S17 Links to empirical data                                                                      | Quotes are included to substantiate the themes presented in the findings section                                                                                                                                                                                                                                                        |
| Discussion                                                                                       |                                                                                                                                                                                                                                                                                                                                         |
| S18 Integration with prior work, implications, transferability, and contribution(s) to the field | Findings are summarised in the discussion section. Findings are also related to future implementation of the intervention and implications for the theoretical perspective (complexity theory)                                                                                                                                          |

|                                                             |                                                                  |
|-------------------------------------------------------------|------------------------------------------------------------------|
| S19 Limitations Trustworthiness and limitations of findings | Limitations of the study are included in the discussion section. |
| S20 Conflicts of interest                                   | The authors have declared there are no conflicts of interest.    |
| S21 Funding                                                 | The funder and grant number is stated.                           |
