# Supplementary material for: Implementation processes in a cognitive rehabilitation intervention for people with dementia: a complexity-informed qualitative analysis
Source: PubMed Central journal article supplement (PMC8549661; doi:10.1136/bmjopen-2021-051255), 2021-10-26
Supplement: bmjopen-2021-051255supp003.pdf [file bmjopen-2021-051255supp003.pdf]

**Appendix 3: Topics recorded by therapists in therapy logs**

| <b><u>Therapy log topic</u></b> | <b><u>Therapist ratings or comments recorded under relevant sessions</u></b>                                                                                                                                                                                                                                                                                                                                                                                                                                                                                                                                                              |
|---------------------------------|-------------------------------------------------------------------------------------------------------------------------------------------------------------------------------------------------------------------------------------------------------------------------------------------------------------------------------------------------------------------------------------------------------------------------------------------------------------------------------------------------------------------------------------------------------------------------------------------------------------------------------------------|
| Compliance                      | Whether given session was completed                                                                                                                                                                                                                                                                                                                                                                                                                                                                                                                                                                                                       |
| Relationships                   | The relationship the therapist developed with the participant and carer, and the relationship between the participant and carer                                                                                                                                                                                                                                                                                                                                                                                                                                                                                                           |
| Goals                           | Participant and carer responsiveness to the solution-focused problem-solving approach<br><br>Goal 1: agreed strategies, between-session practice, and progress<br><br>Goal 2: agreed strategies, between-session practice, and progress<br><br>Goal 3: agreed strategies, between-session practice, and progress<br><br>Any adjustments or modifications to goal statements provided at baseline<br><br>In-session goal attainment ratings by participant, carer and therapist (sessions 10 and 14) and comments on these<br><br>Selection of goal attainment scaling indicators for each goal (sessions 10 and 14) and comments on these |
| Activity levels                 | Review of activity levels, plan for behavioural activation to increase activity engagement, and comments on progress                                                                                                                                                                                                                                                                                                                                                                                                                                                                                                                      |
| Compensatory strategy use       | Review of current use of compensatory strategies and environmental adaptations, plan to develop strategy use, and comments on progress                                                                                                                                                                                                                                                                                                                                                                                                                                                                                                    |
| Restorative strategy use        | Response to information about restorative strategies, plan for developing restorative strategy use, and comments on progress                                                                                                                                                                                                                                                                                                                                                                                                                                                                                                              |
| Attention and concentration     | Strategies introduced to help maintain attention and concentration, and progress with applying these strategies                                                                                                                                                                                                                                                                                                                                                                                                                                                                                                                           |

|                       |                                                                                                                                                                                                                                       |
|-----------------------|---------------------------------------------------------------------------------------------------------------------------------------------------------------------------------------------------------------------------------------|
| Anxiety management    | Current use of anxiety management strategies, carer's perspective on the participant's use of these strategies, introduction or refinement of anxiety management technique(s), and progress with use of anxiety management strategies |
| Carer well-being      | Review with carer, and plan for enhancing carer well-being                                                                                                                                                                            |
| Carer involvement     | The extent to which the carer was engaged in supporting the process of therapy                                                                                                                                                        |
| Ending therapy        | Plans for maintaining progress after the end of the intervention, and review of other sources of help and support                                                                                                                     |
| Experience of therapy | Review with the participant and with the carer, and therapist reflection on the process of therapy; therapist confidence in addressing participants' goals (following the nine month follow-up)                                       |
